# Supplementary material for: One-pot synthesis of 2-aminoquinoline-based alkaloids from acetonitrile
Source: Royal Society of Chemistry journal article supplement (doi:10.1039/c2ob25709b), 2012-01-01

Supporting Information

**One-pot synthesis of 2-aminoquinoline-based alkaloids from acetonitrile**

Takashi Tomioka\*, Yusuke Takahashi, and Toshihide Maejima

*Department of Chemistry and Biochemistry, University of Mississippi, University,  
Mississippi 38677, USA*

tomioka@olemiss.edu

**Table of Contents**

<sup>1</sup>H and <sup>13</sup>C NMR Spectra of Compounds.....S2

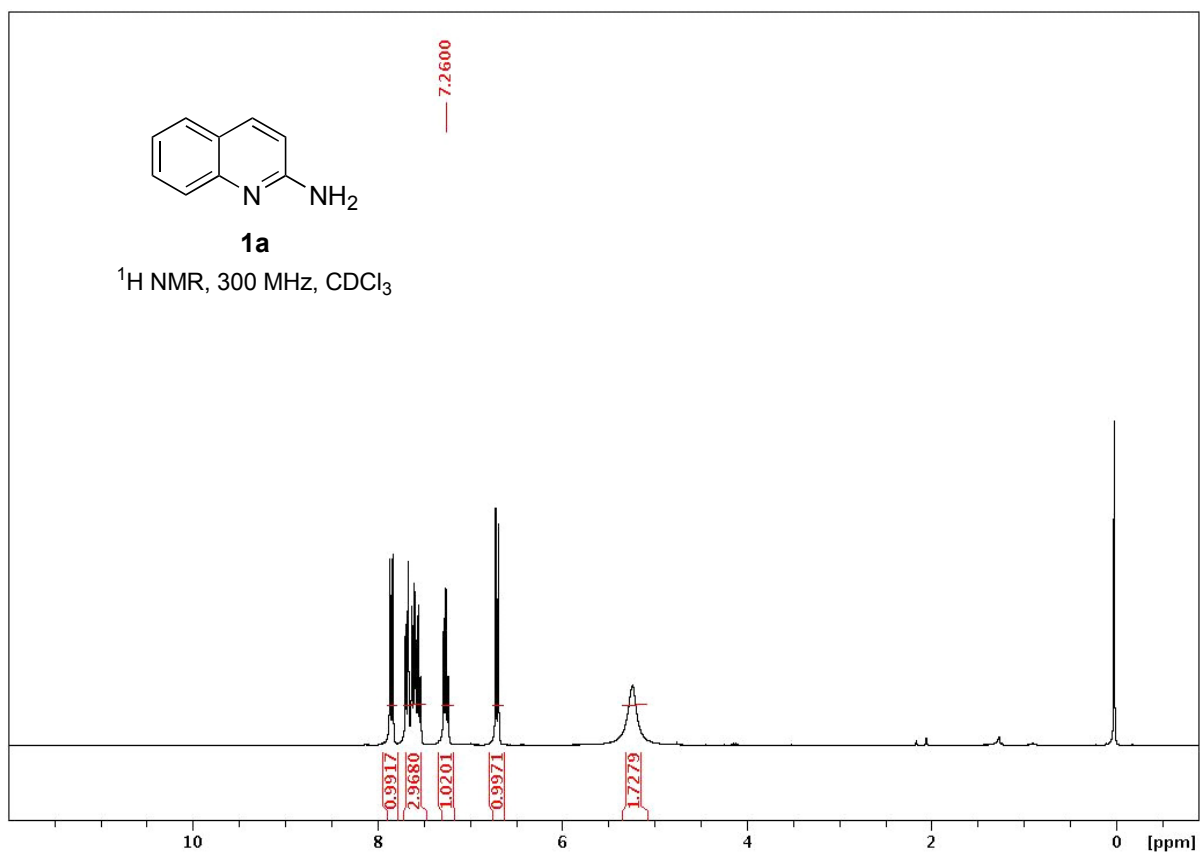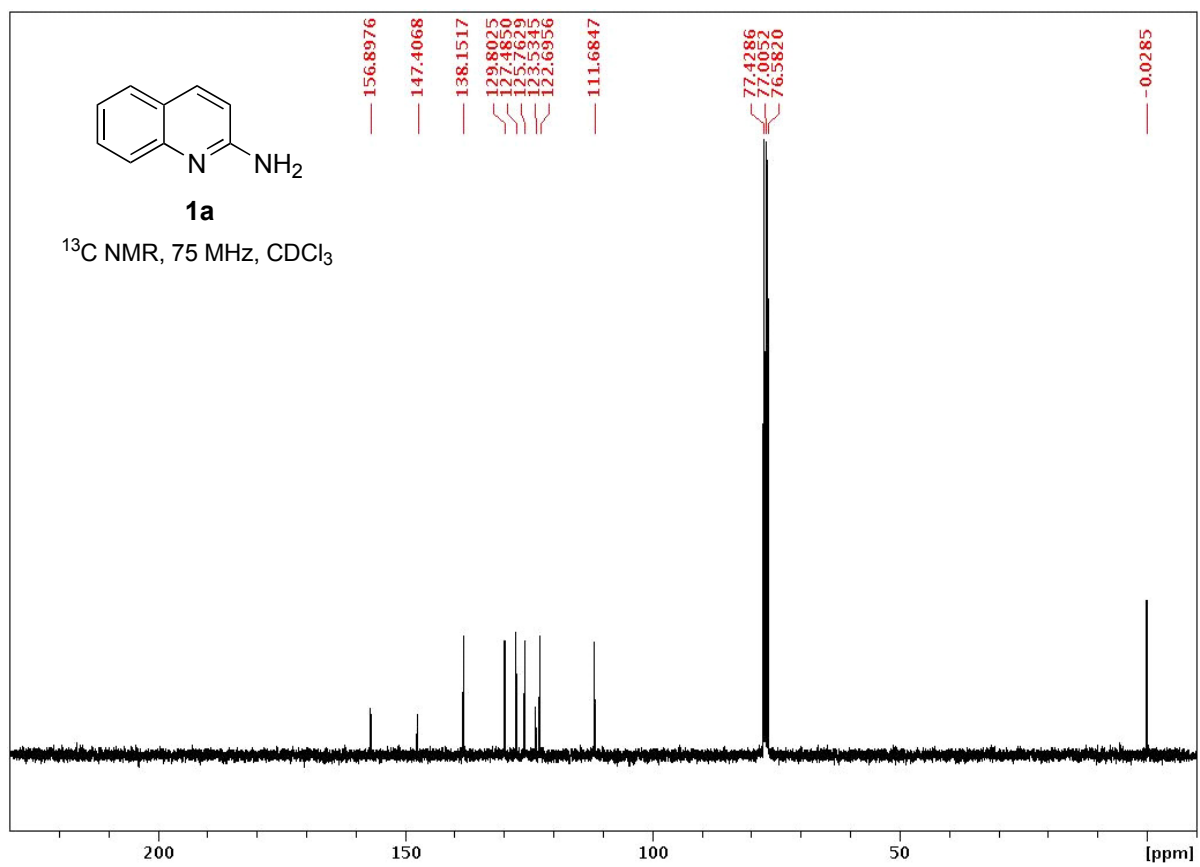

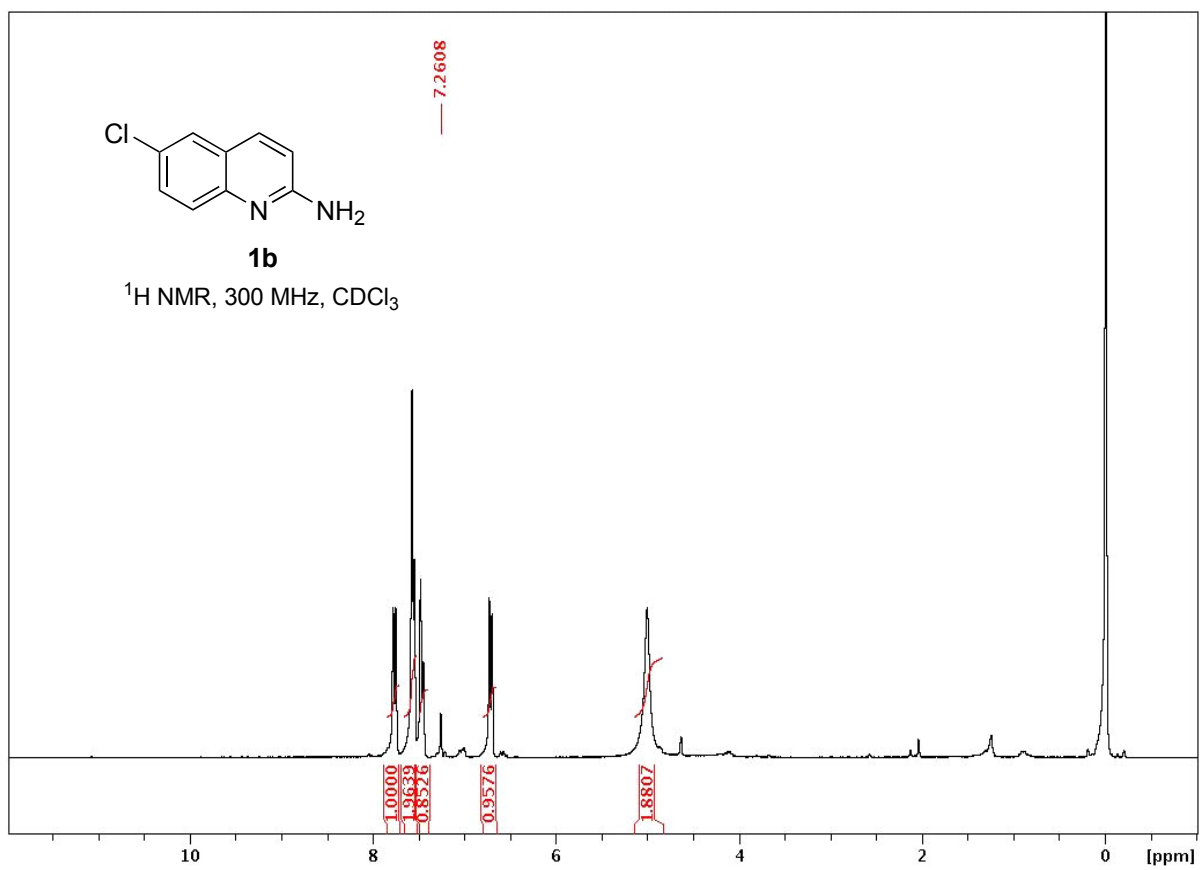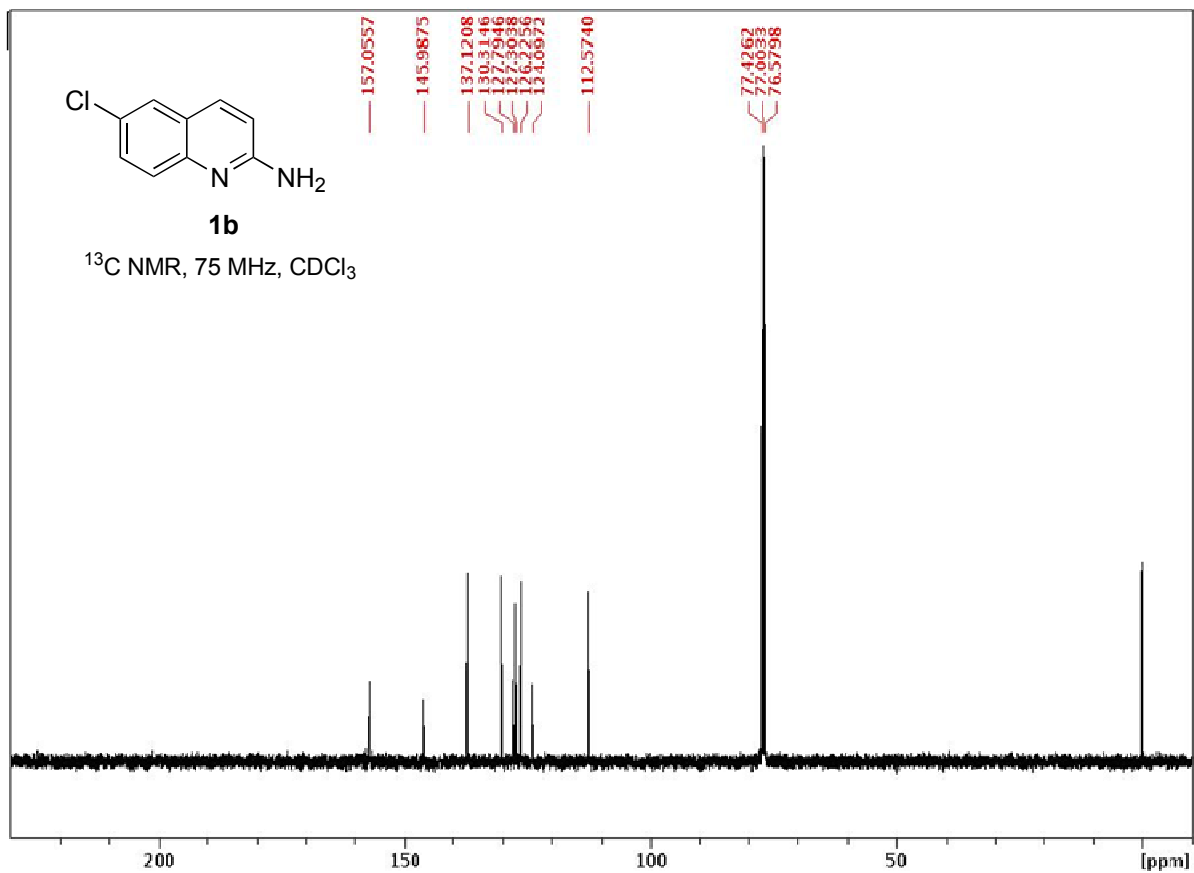

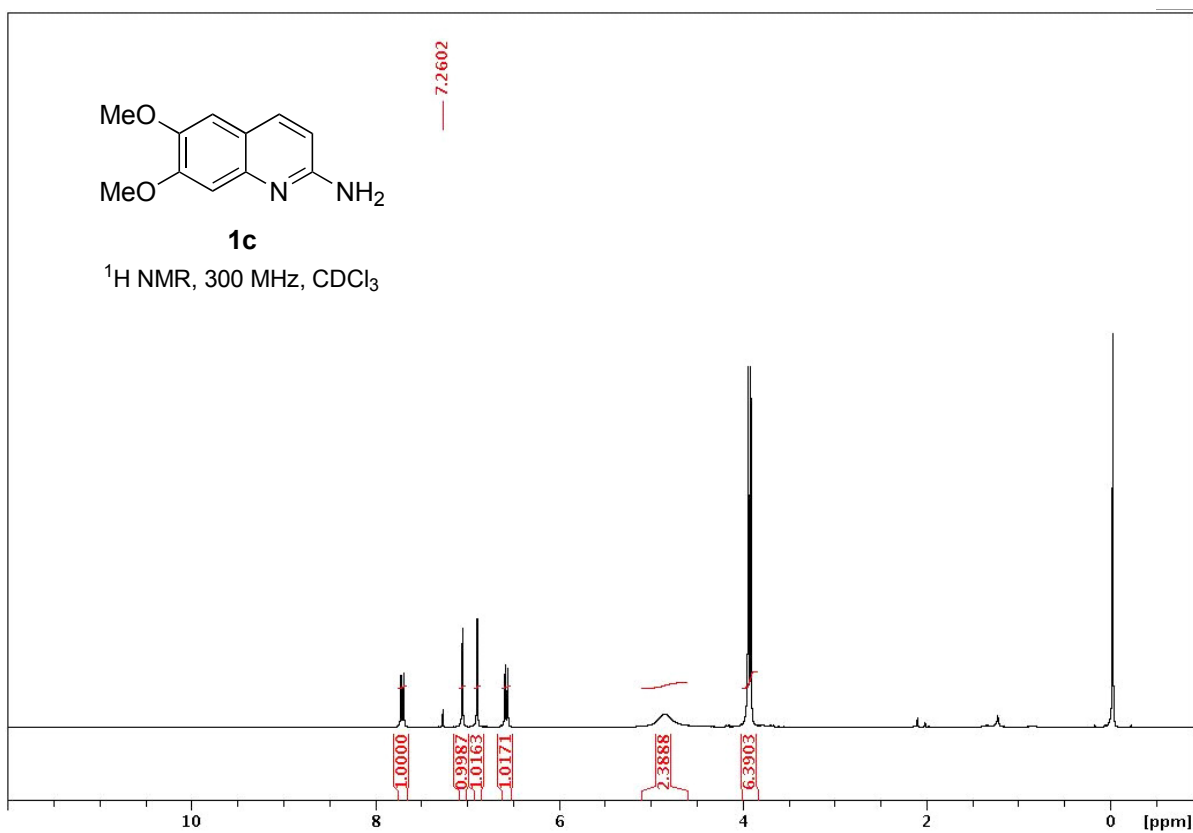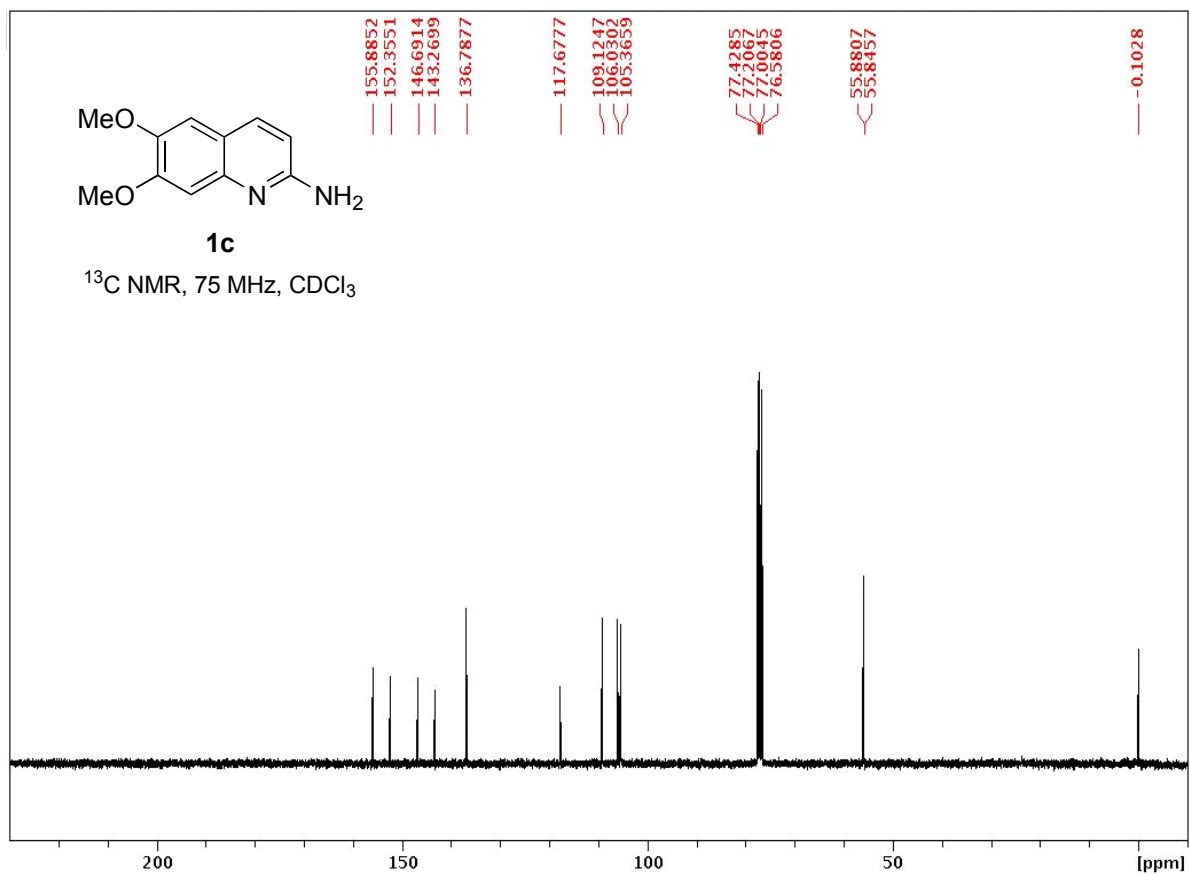

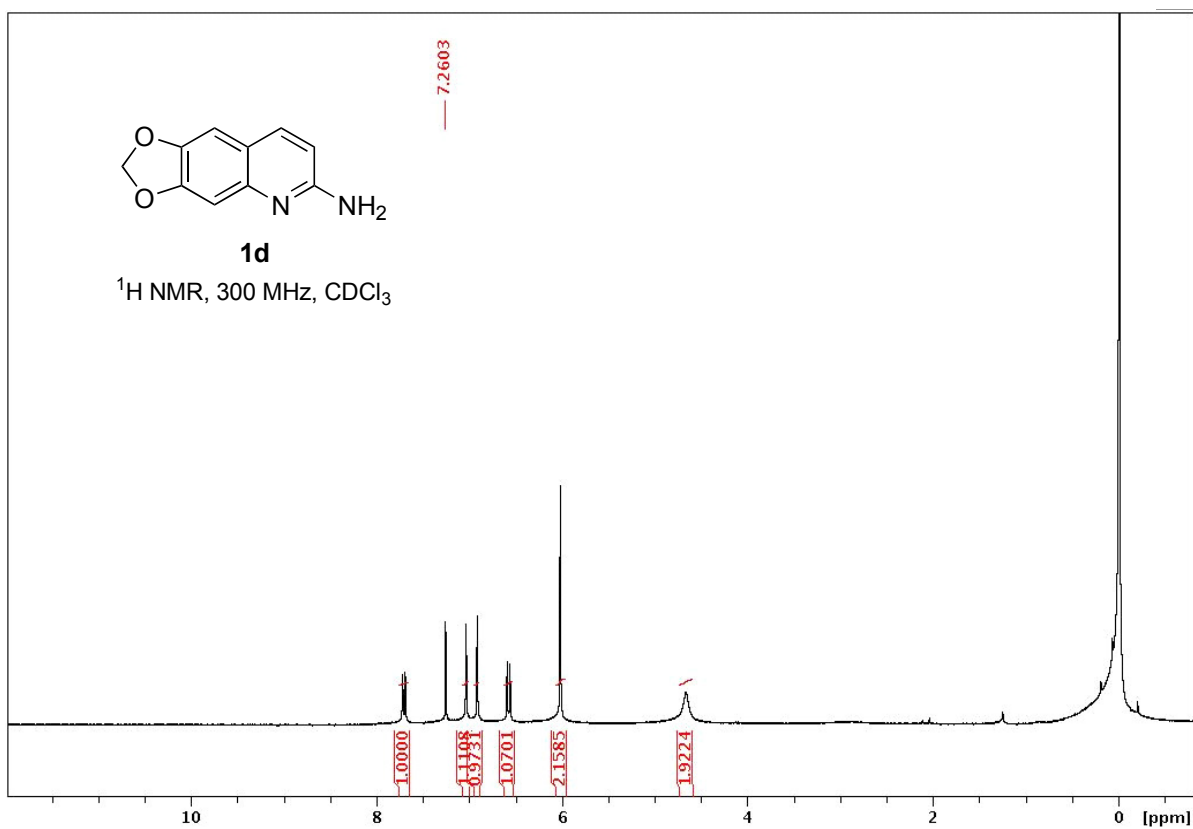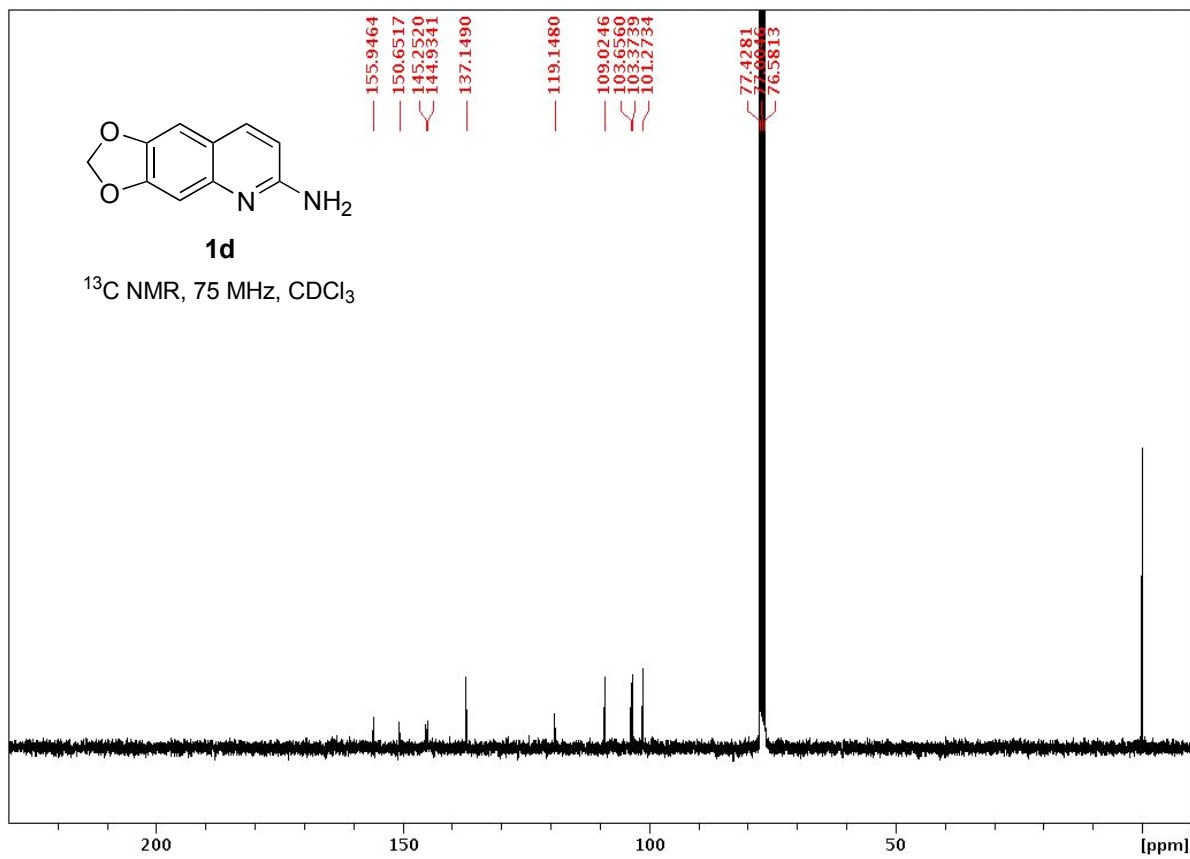

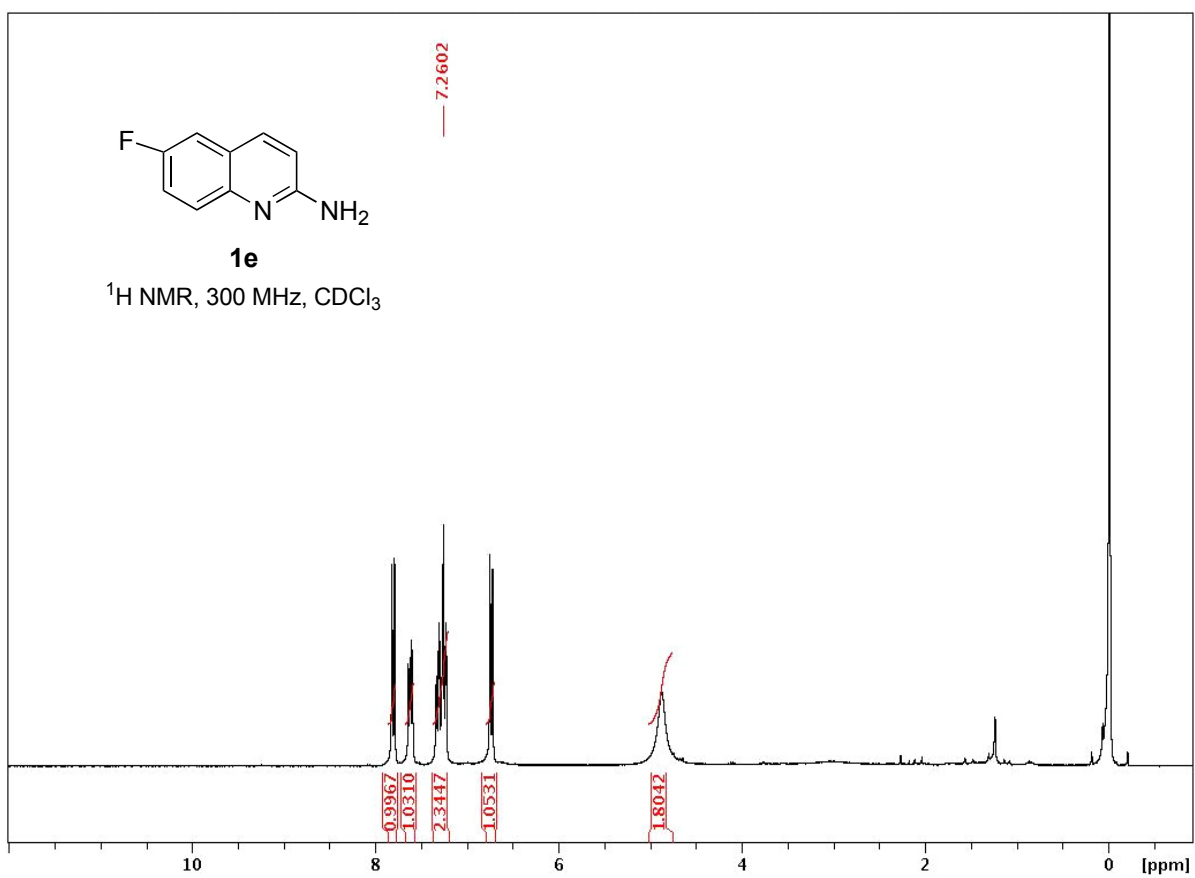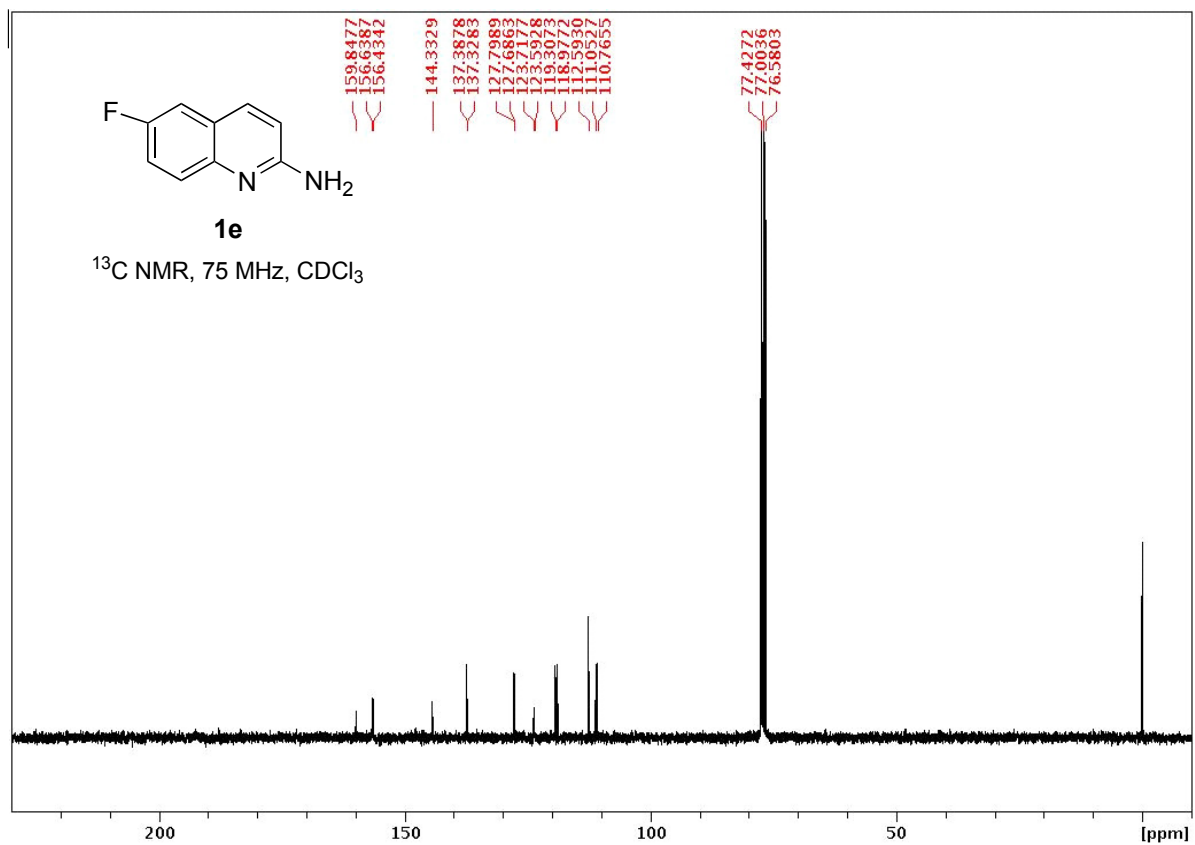

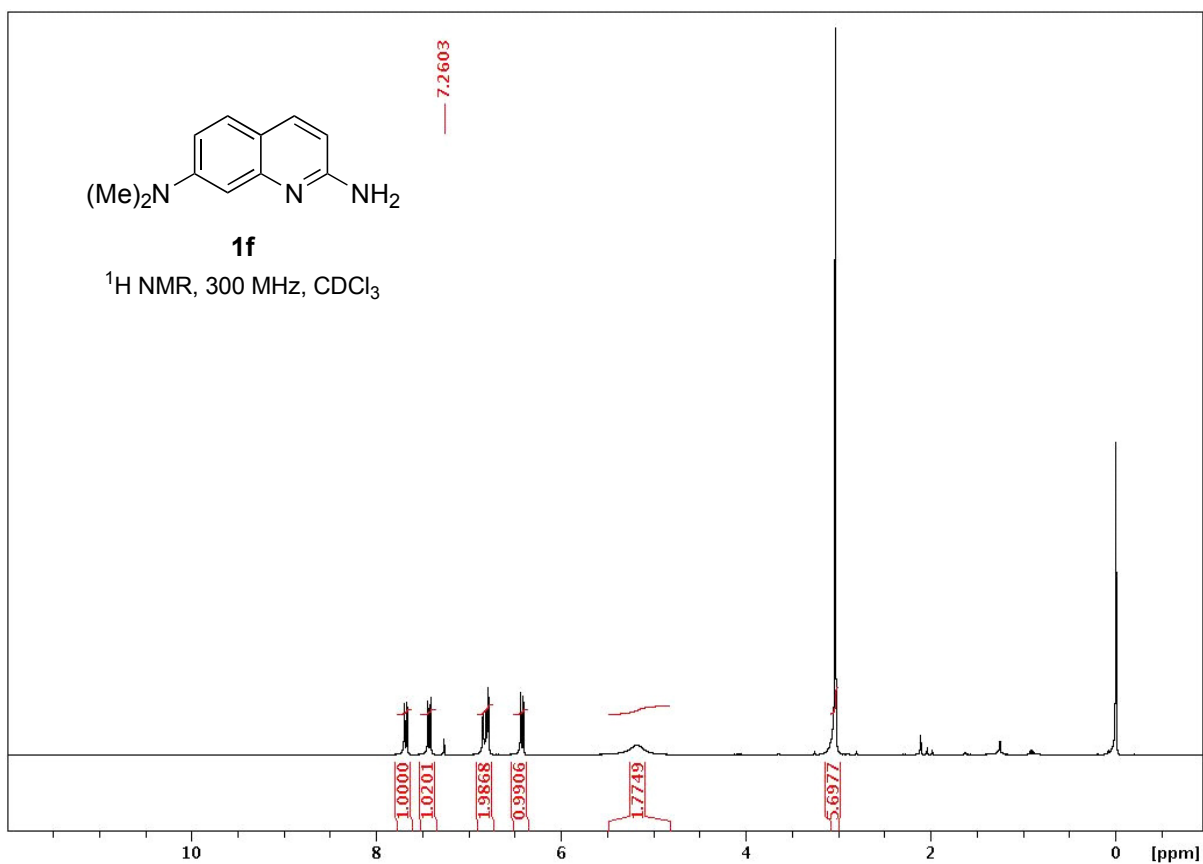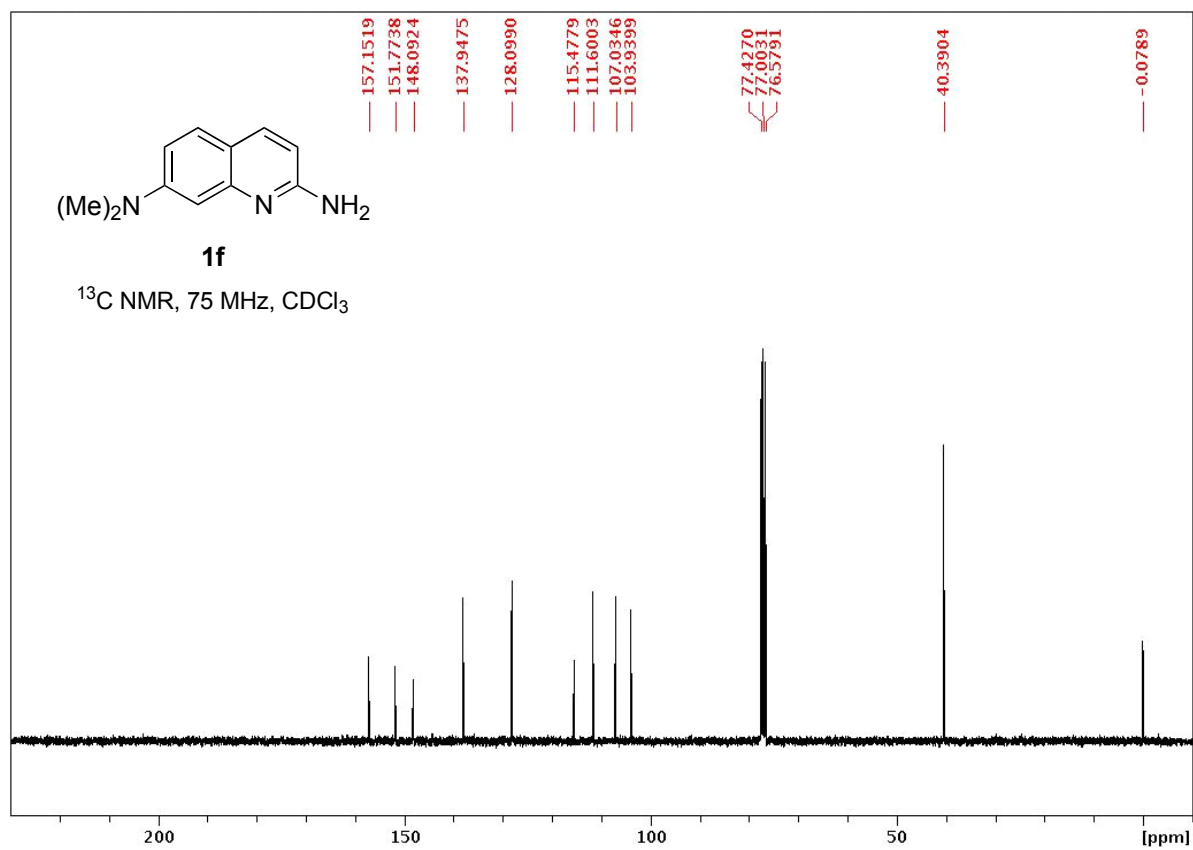

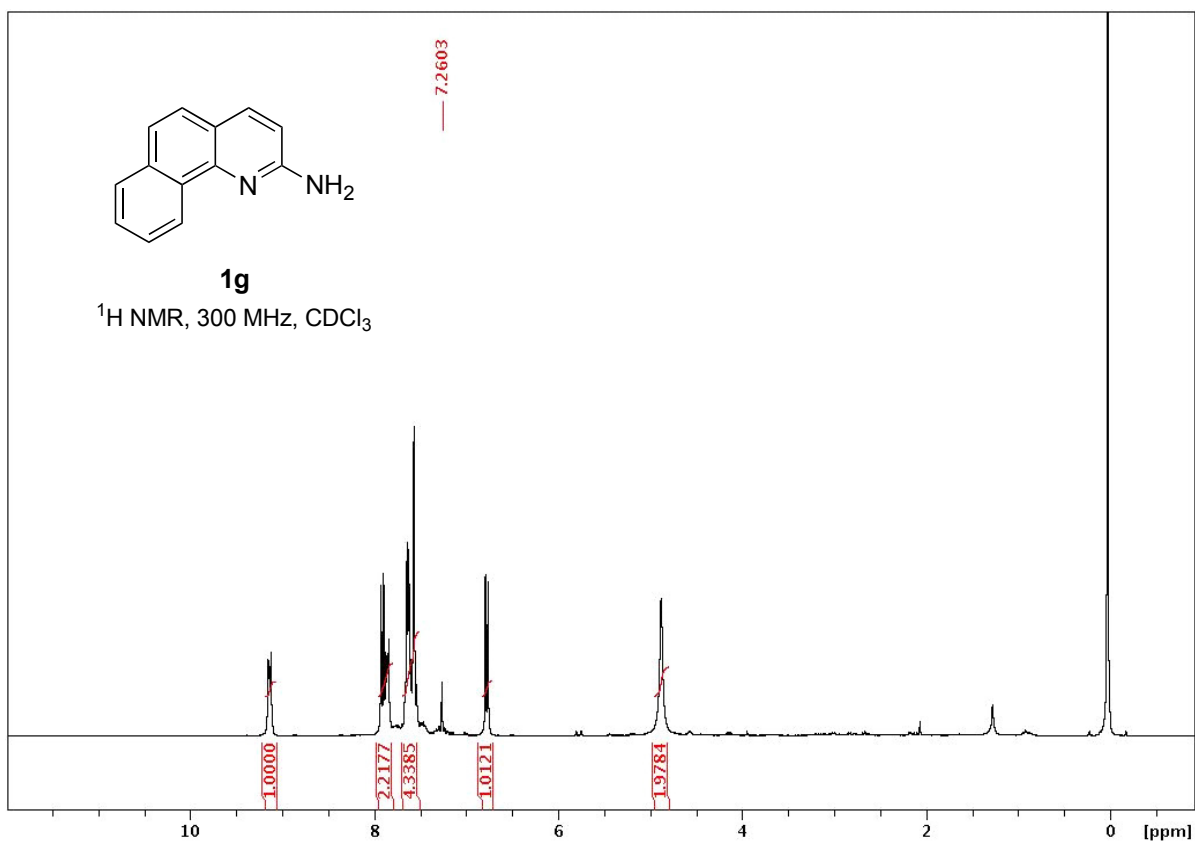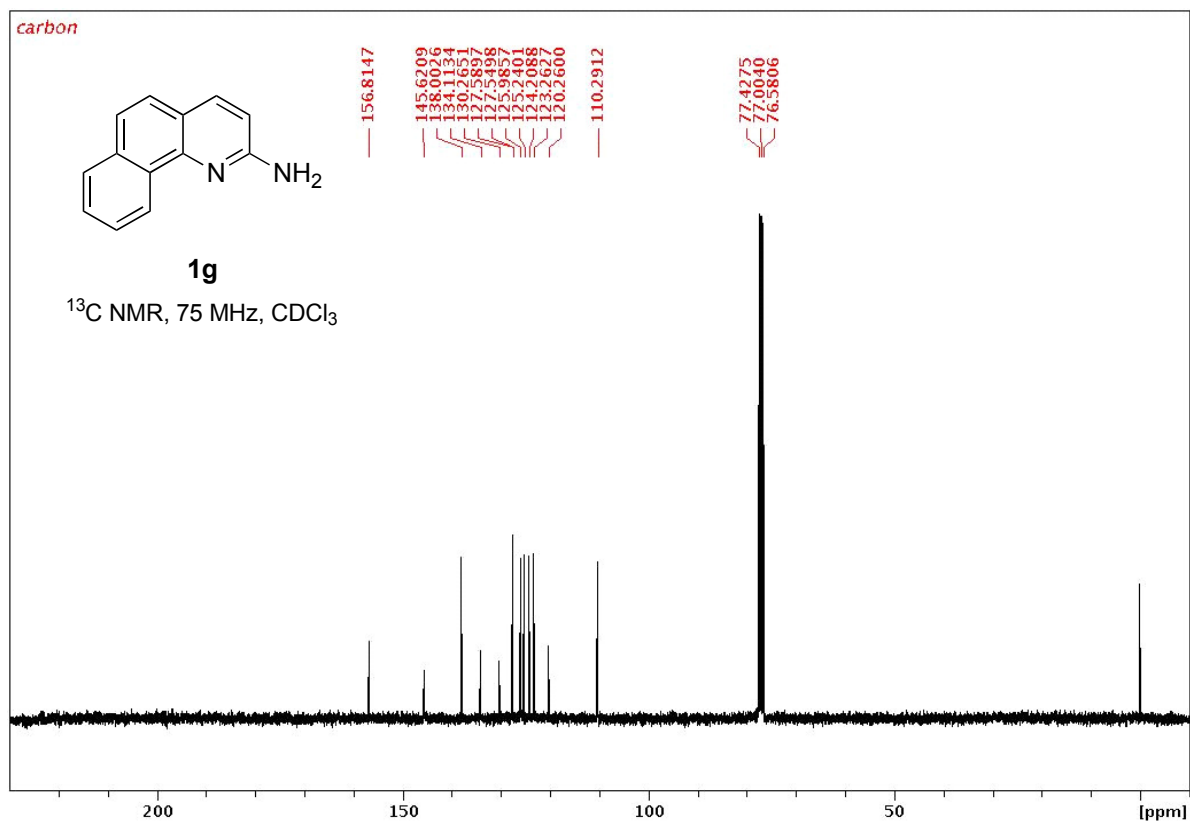



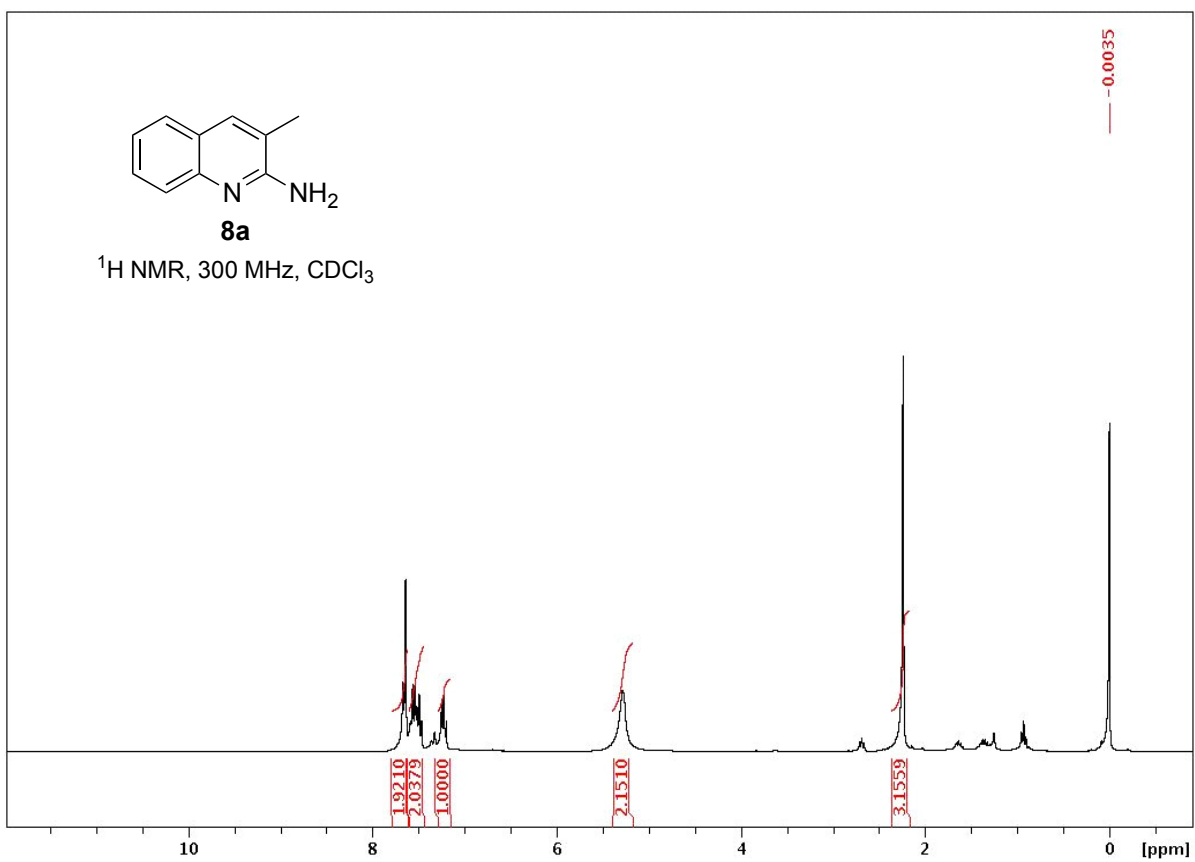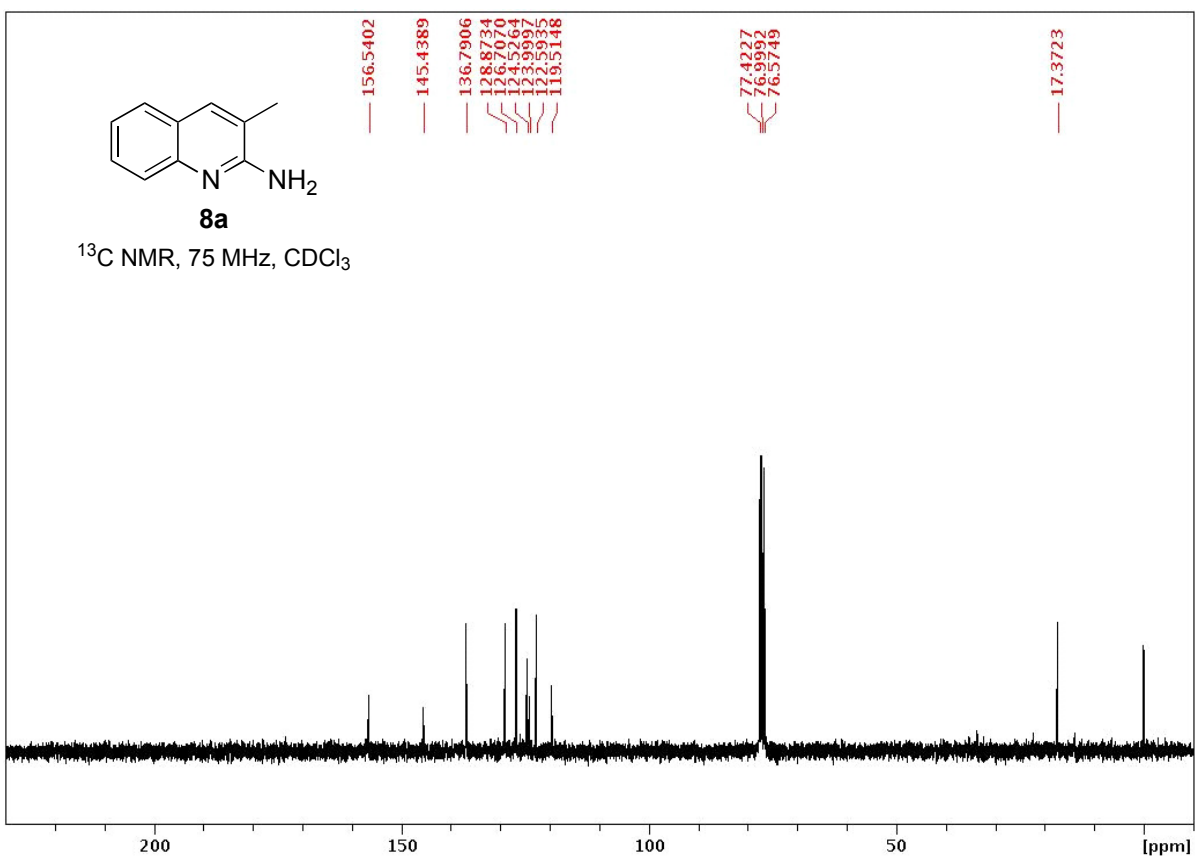

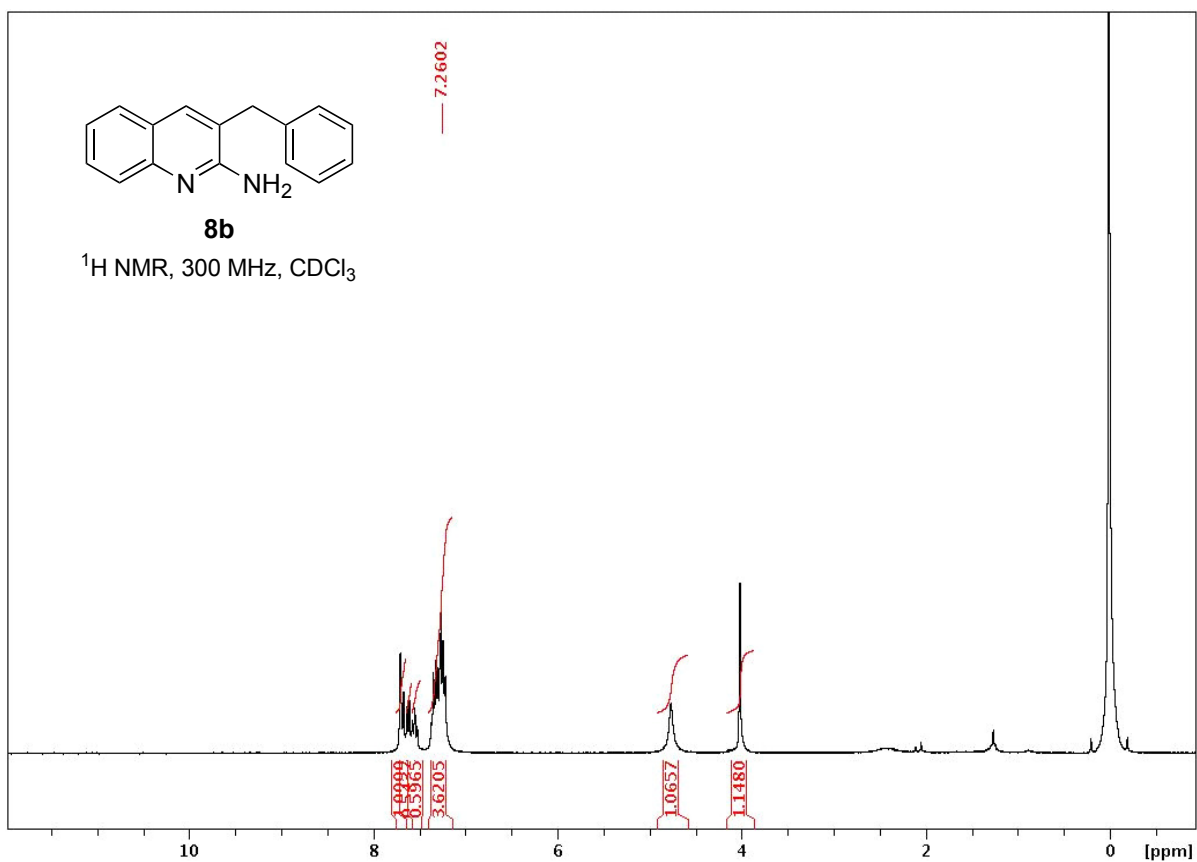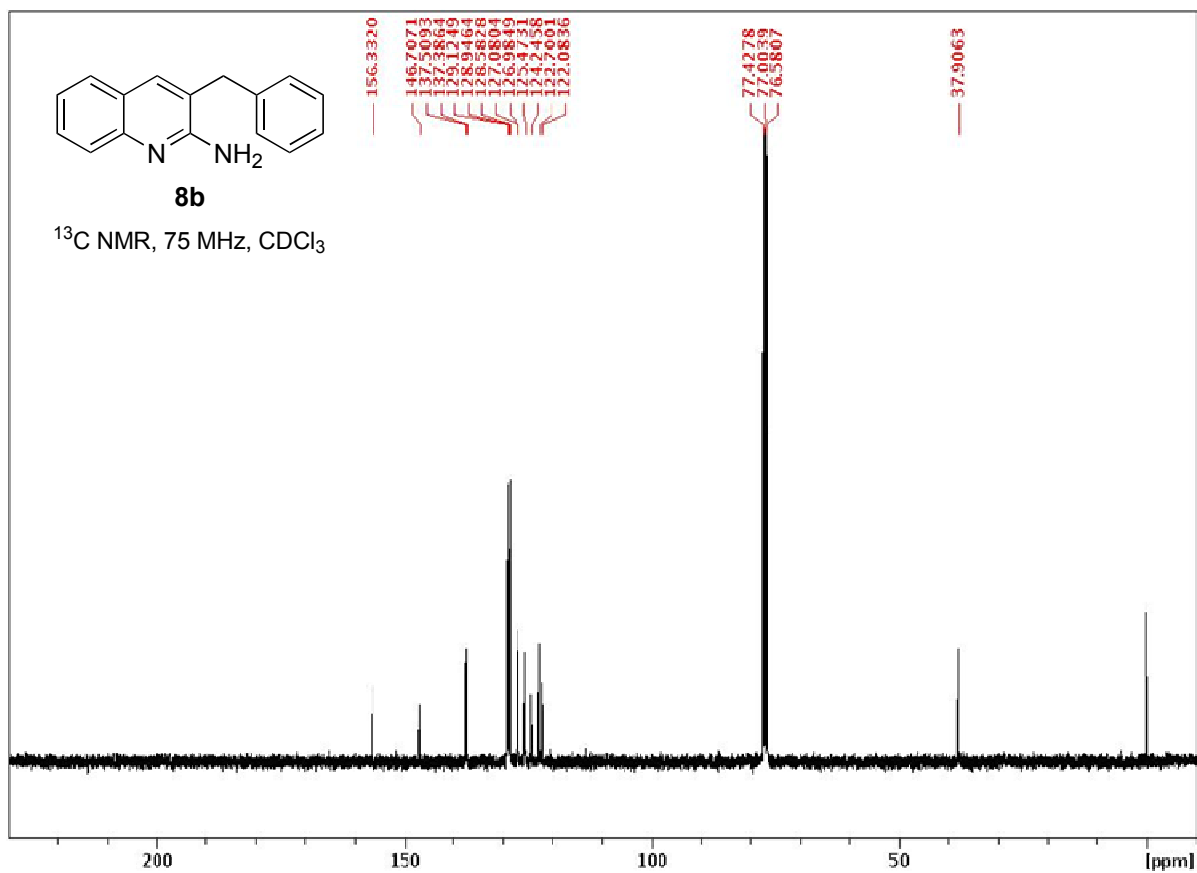

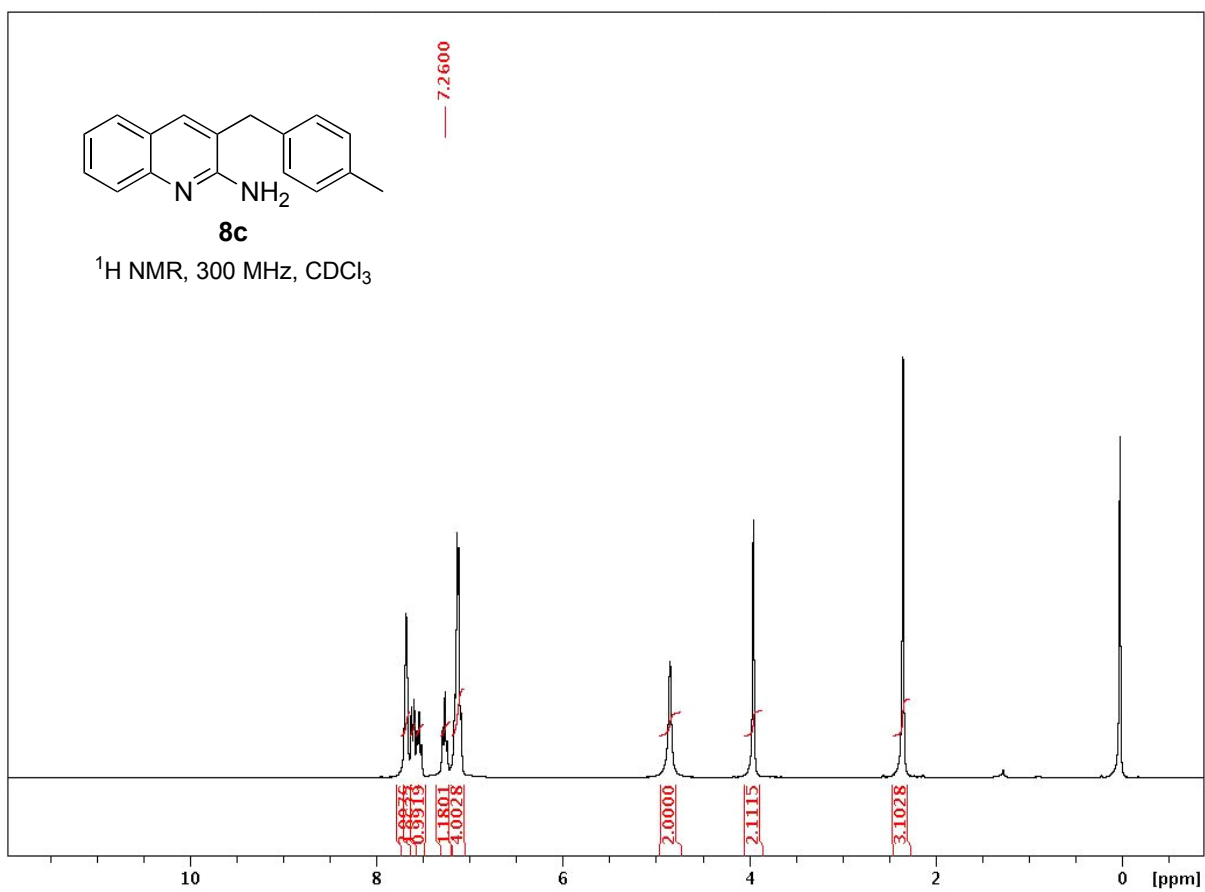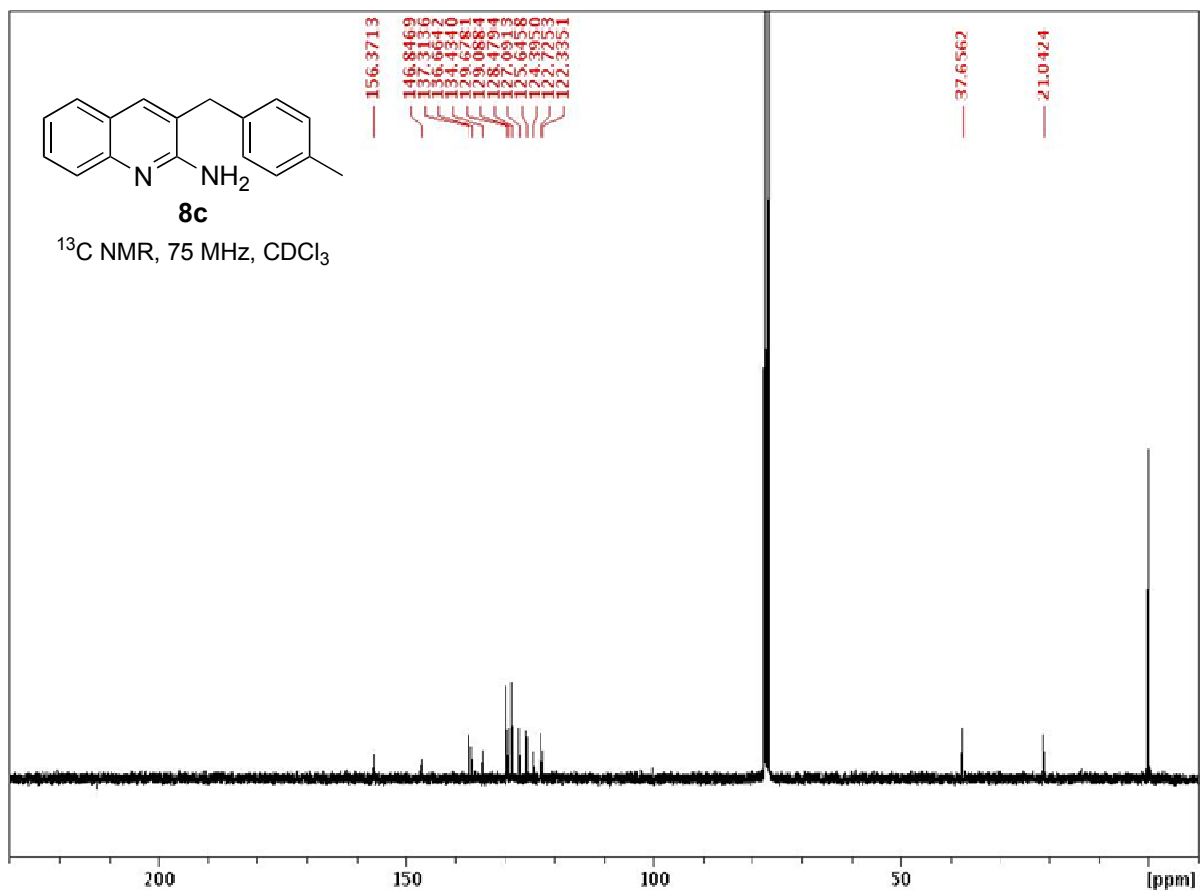

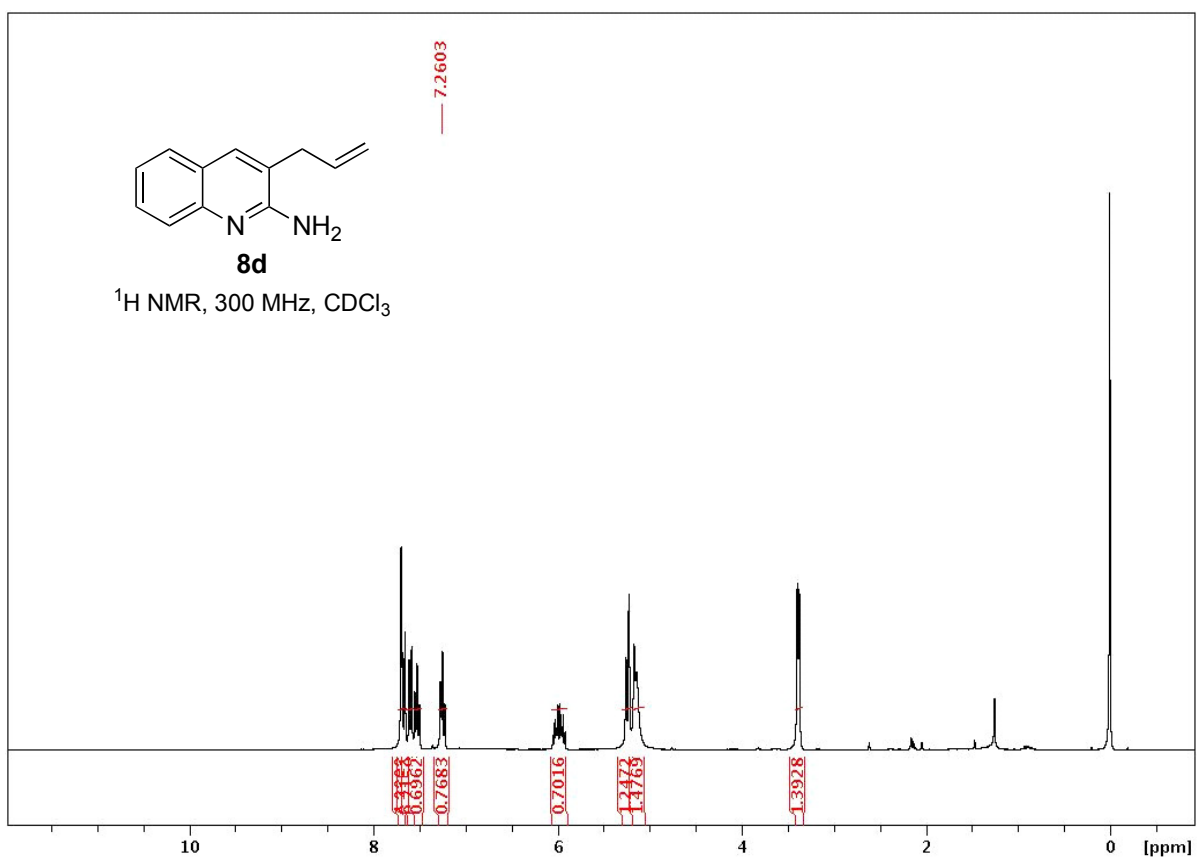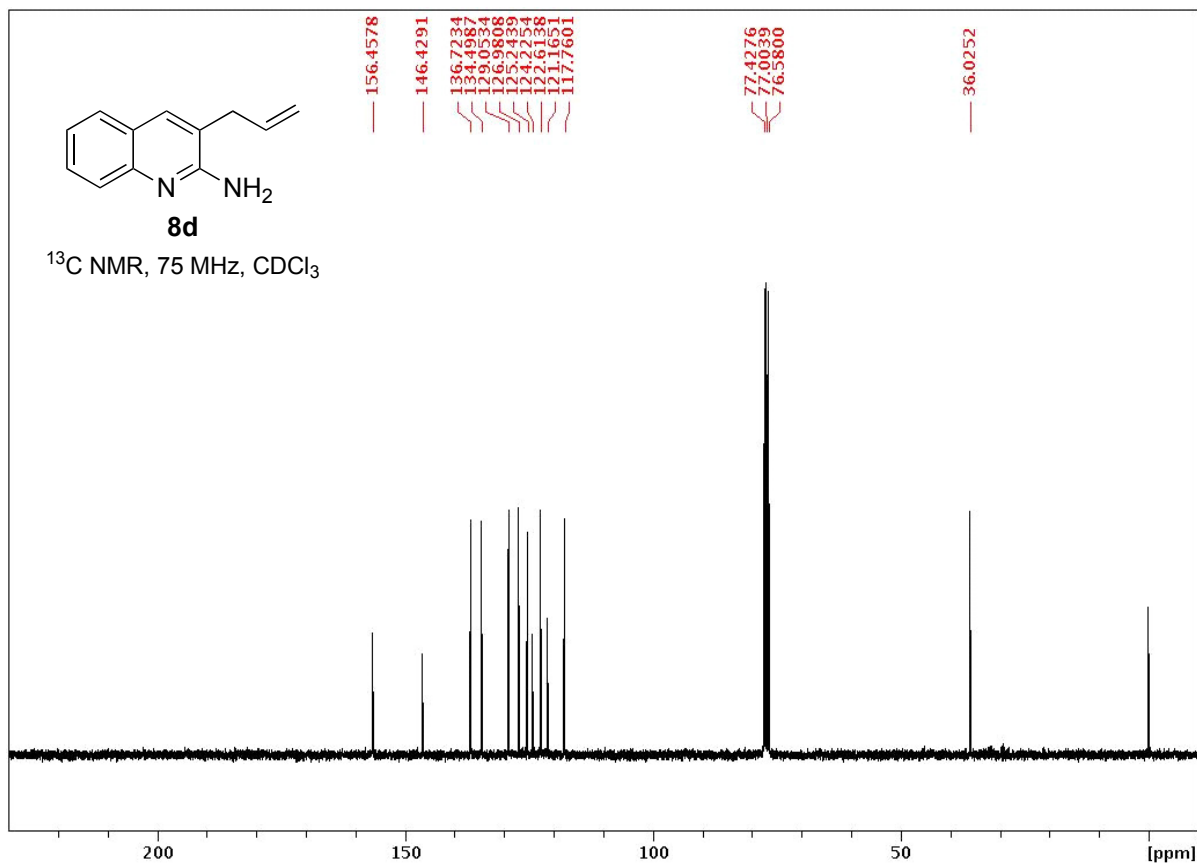

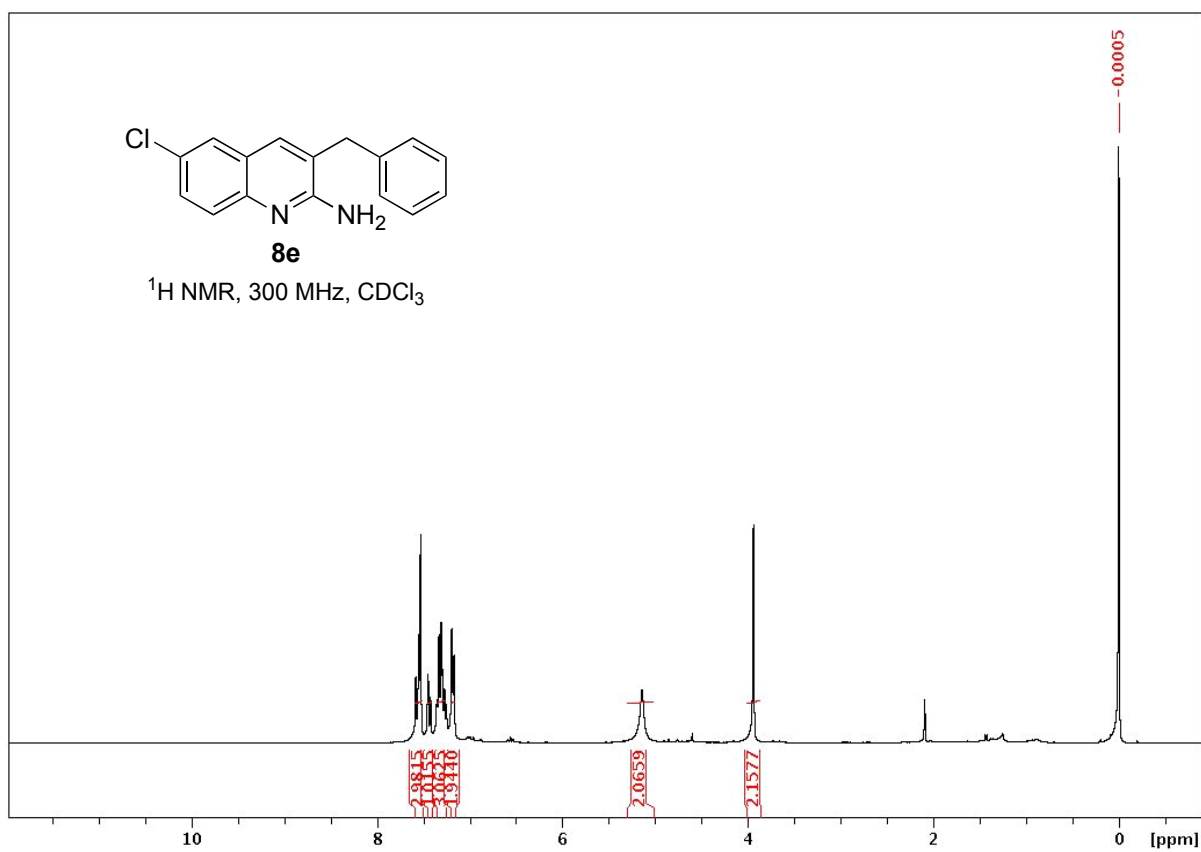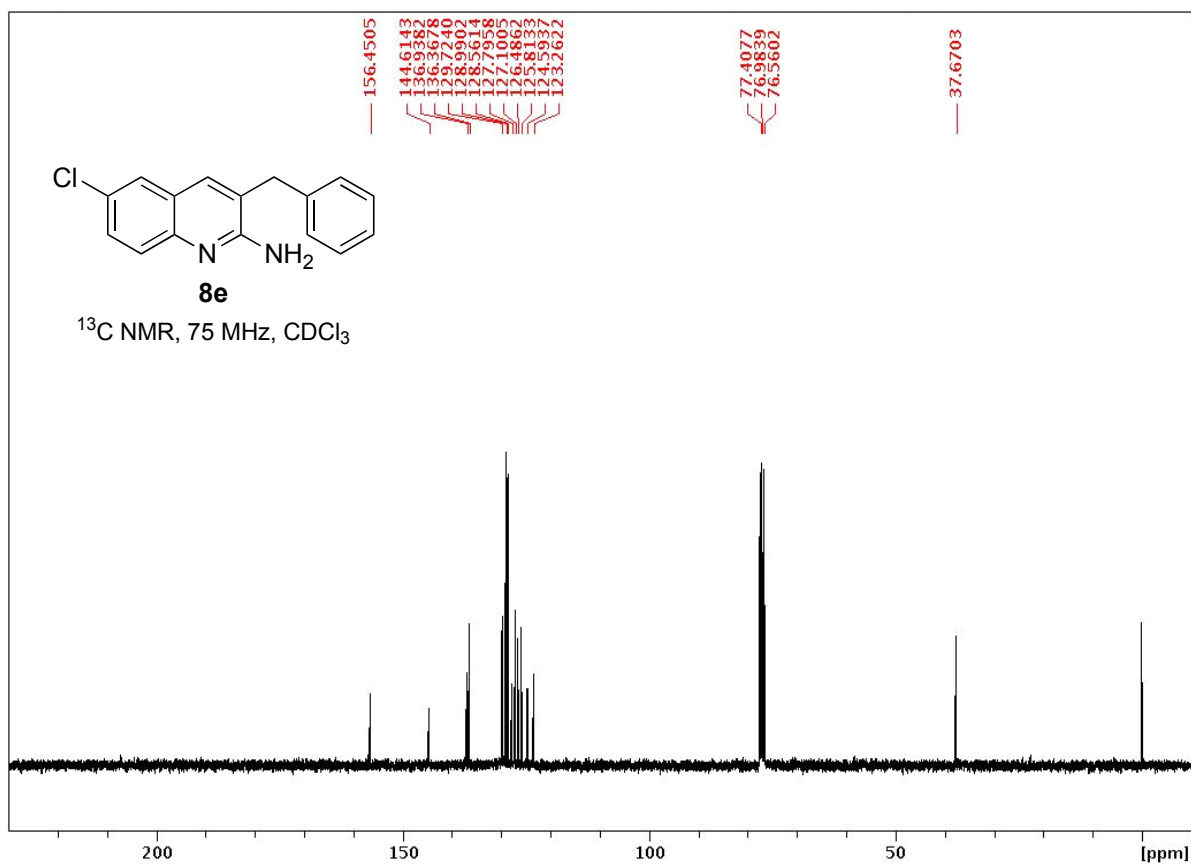

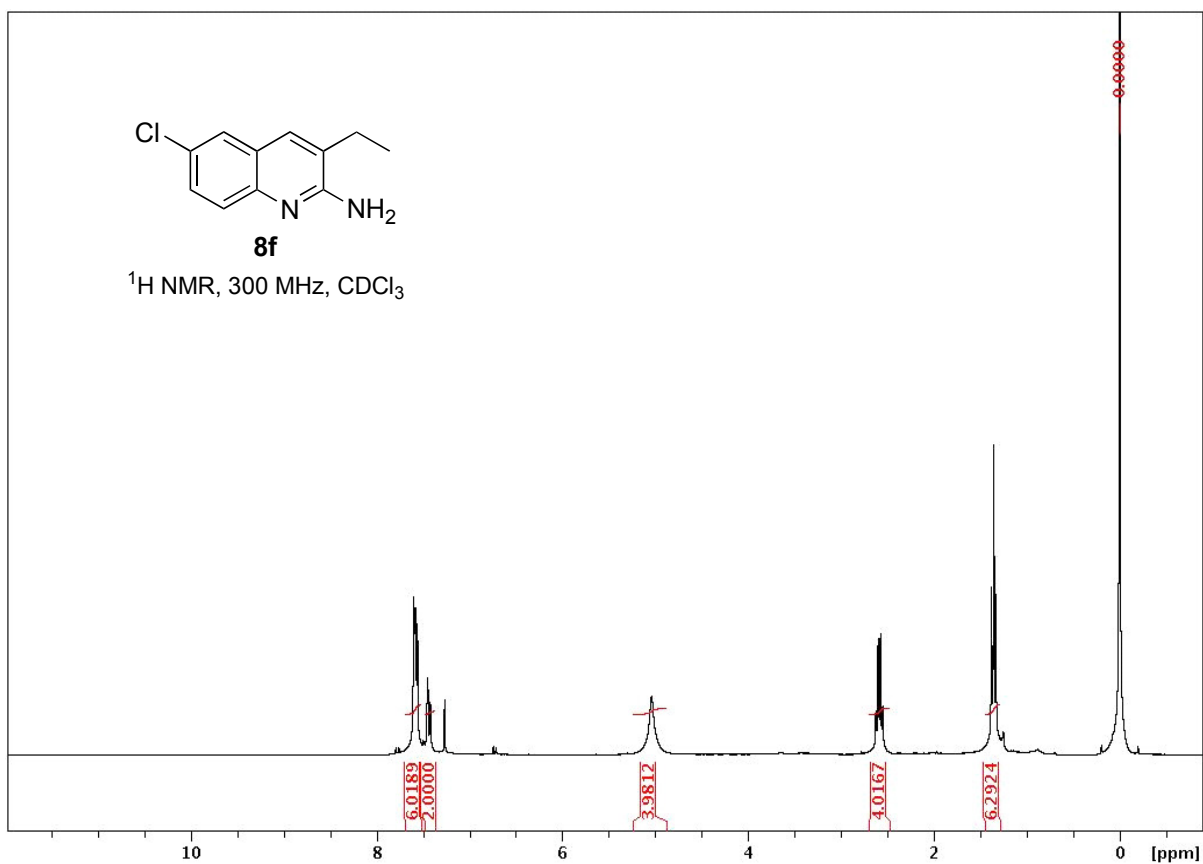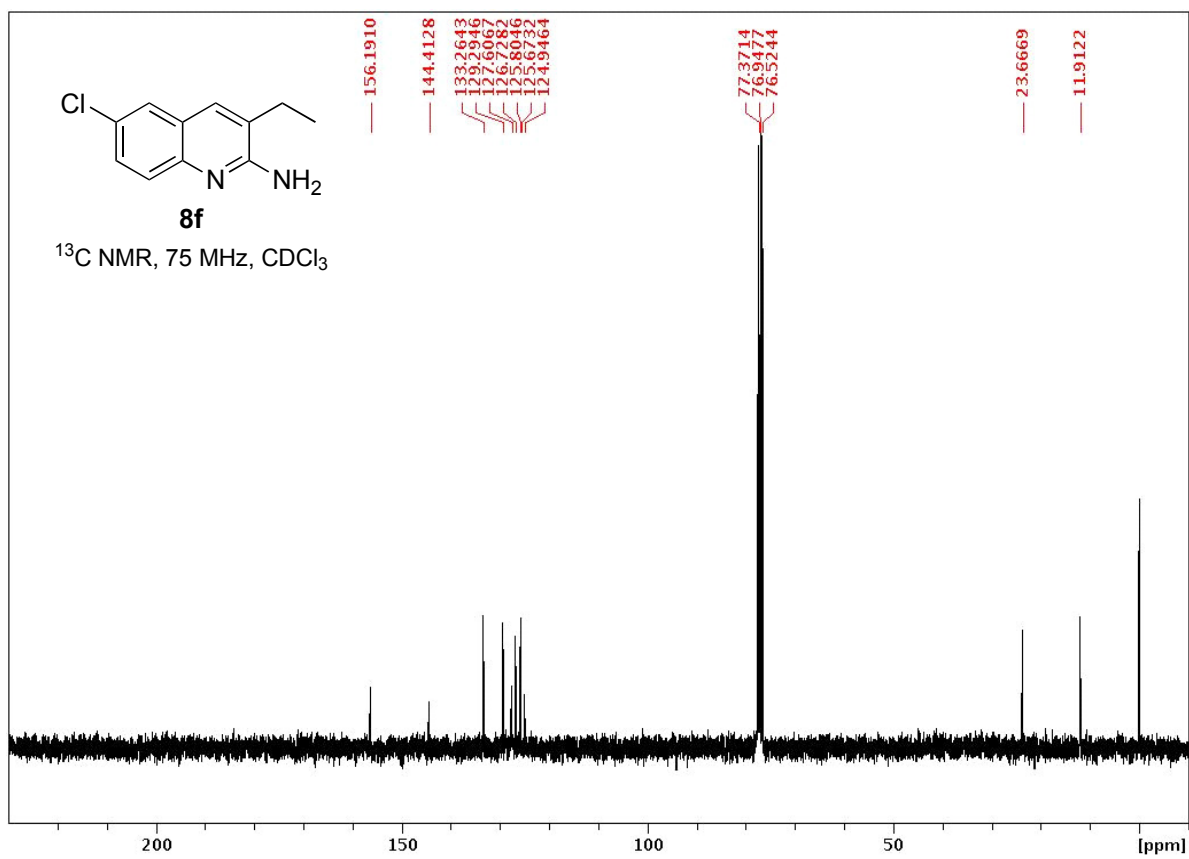

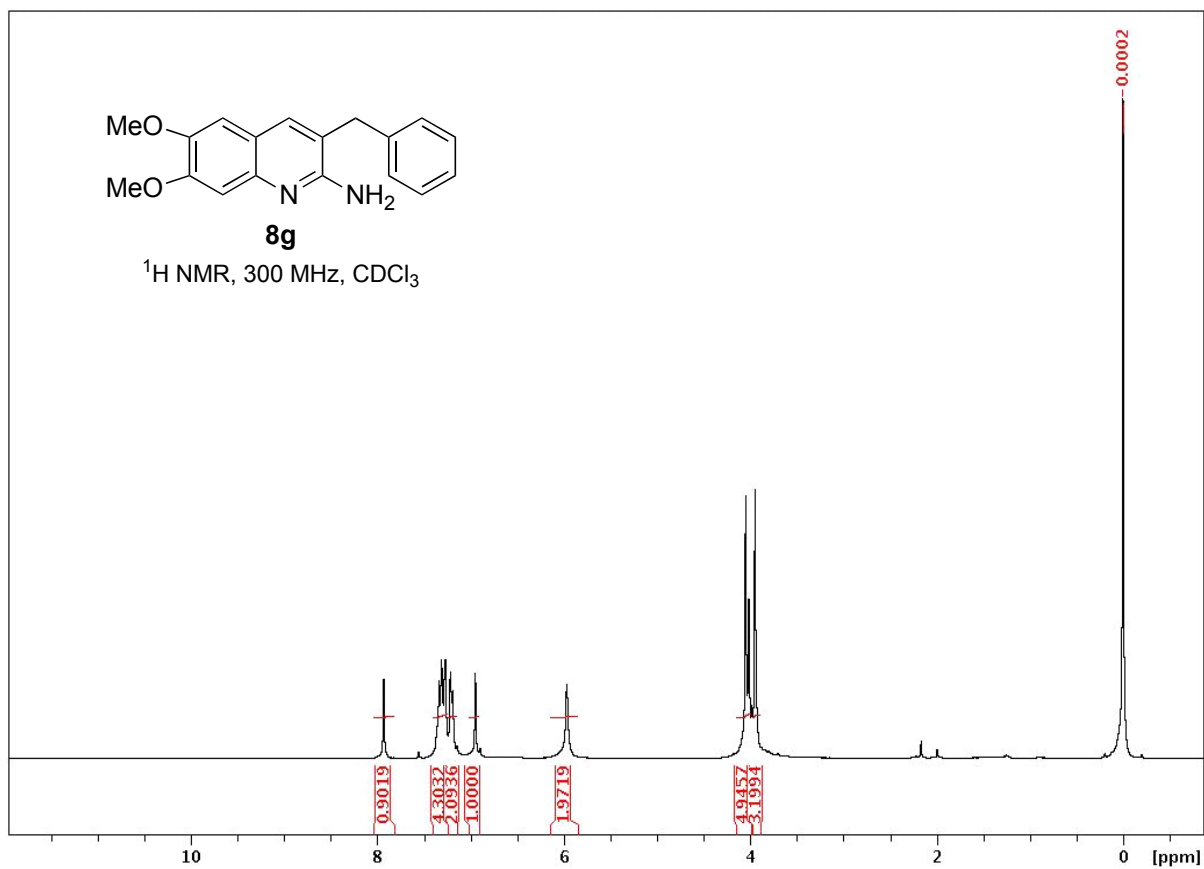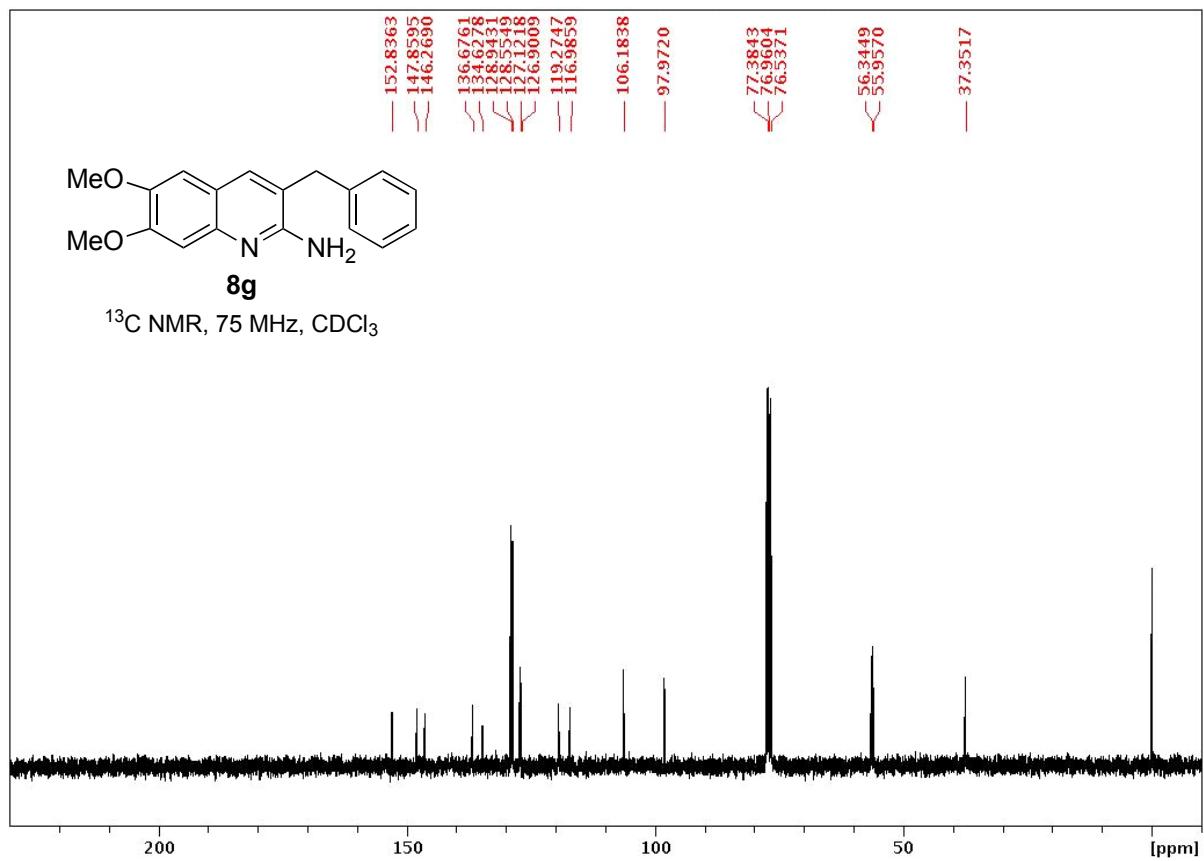

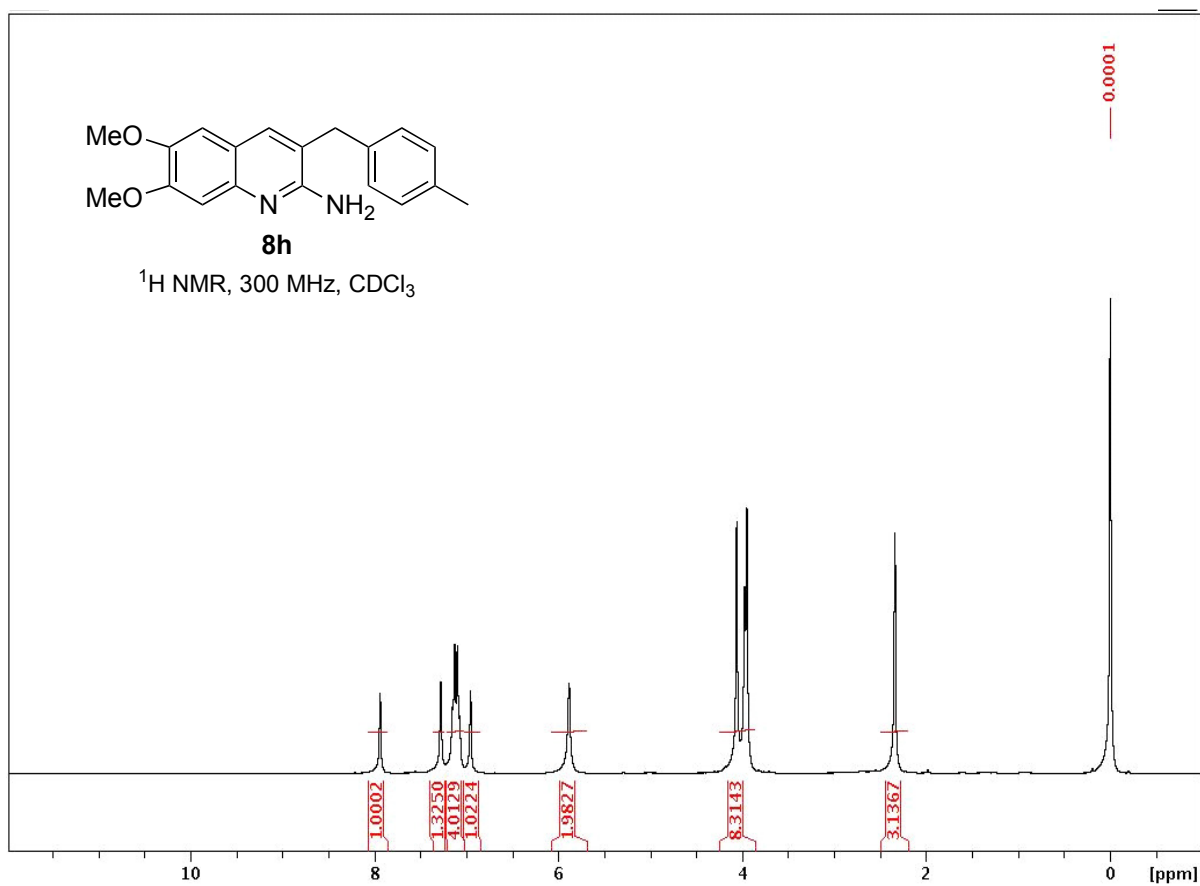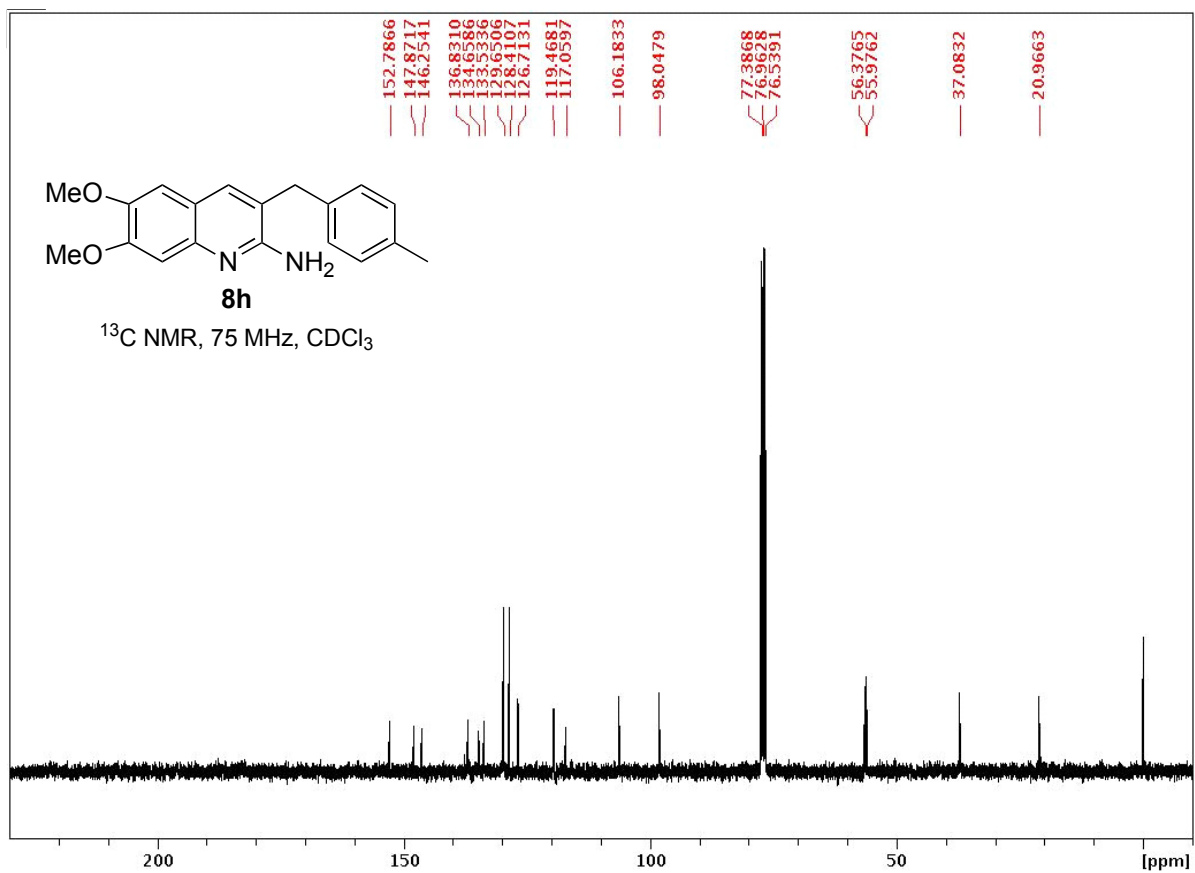



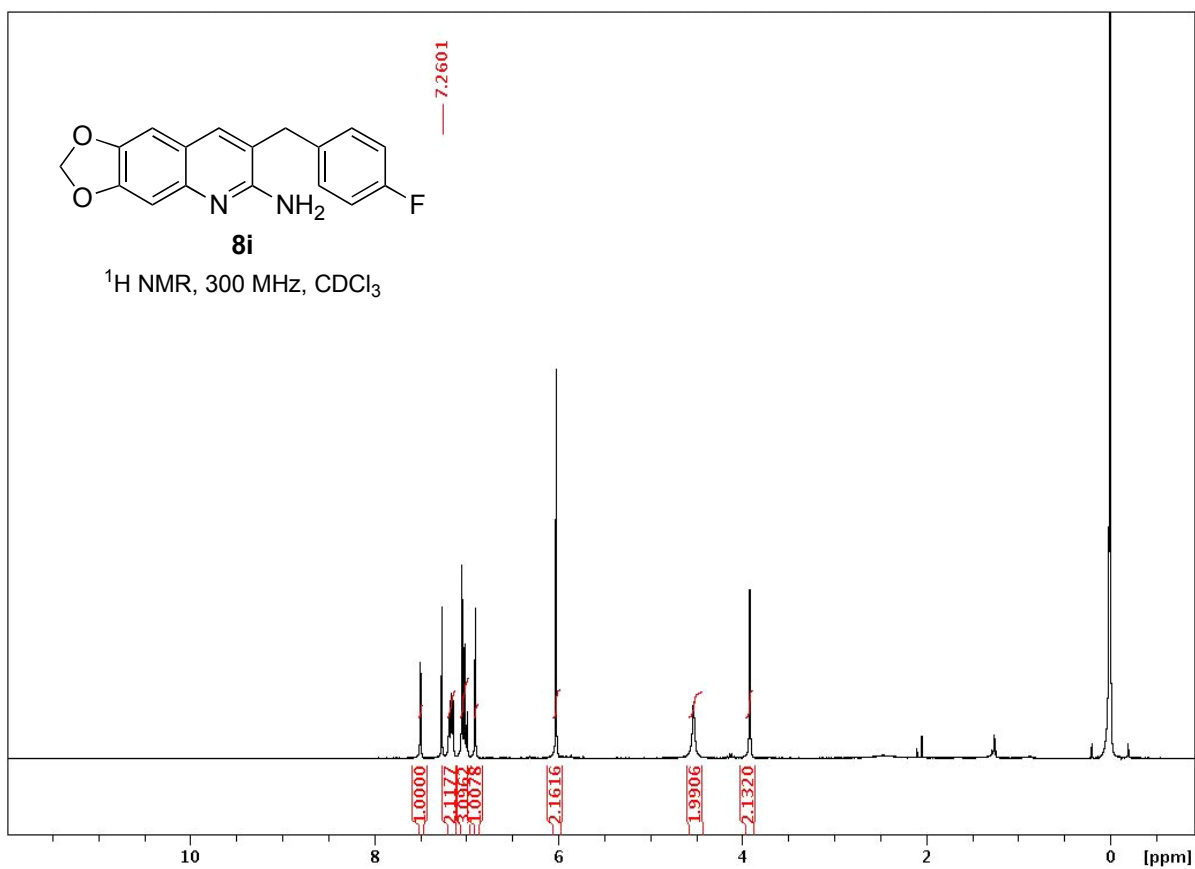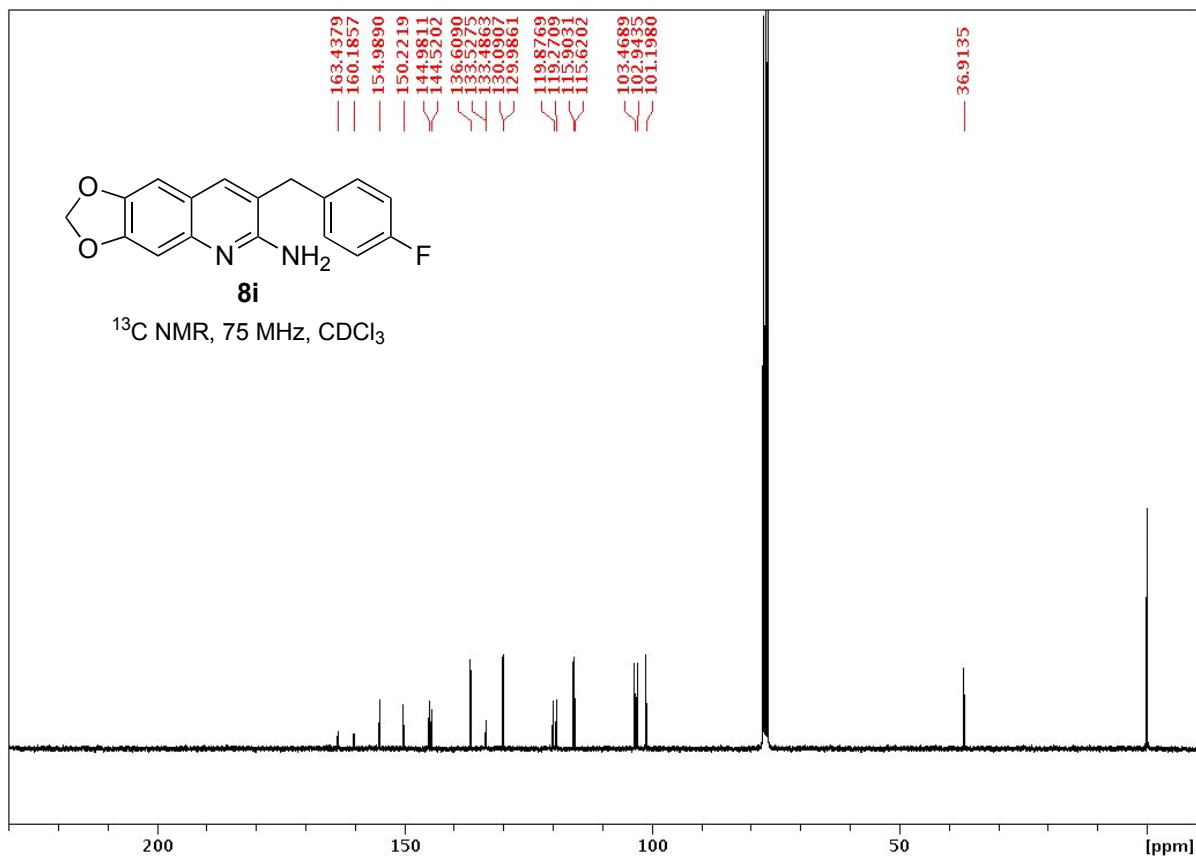

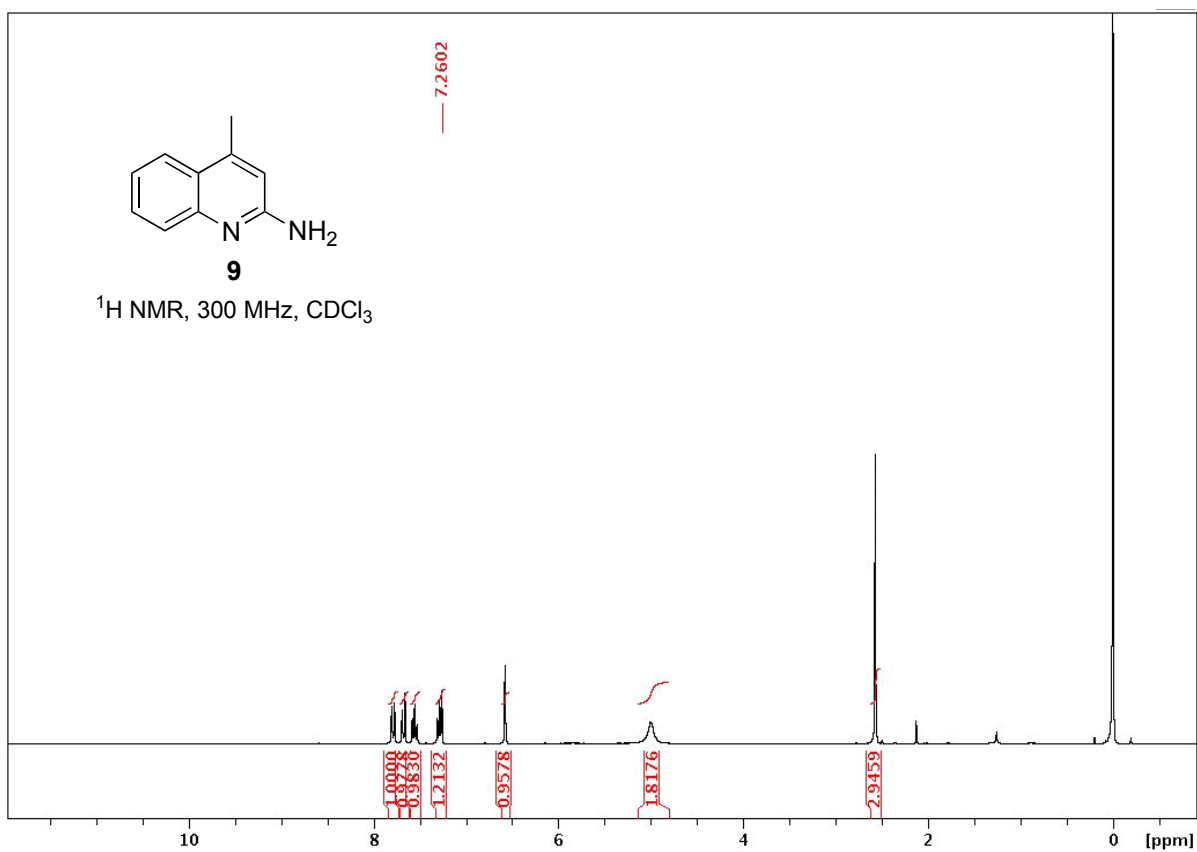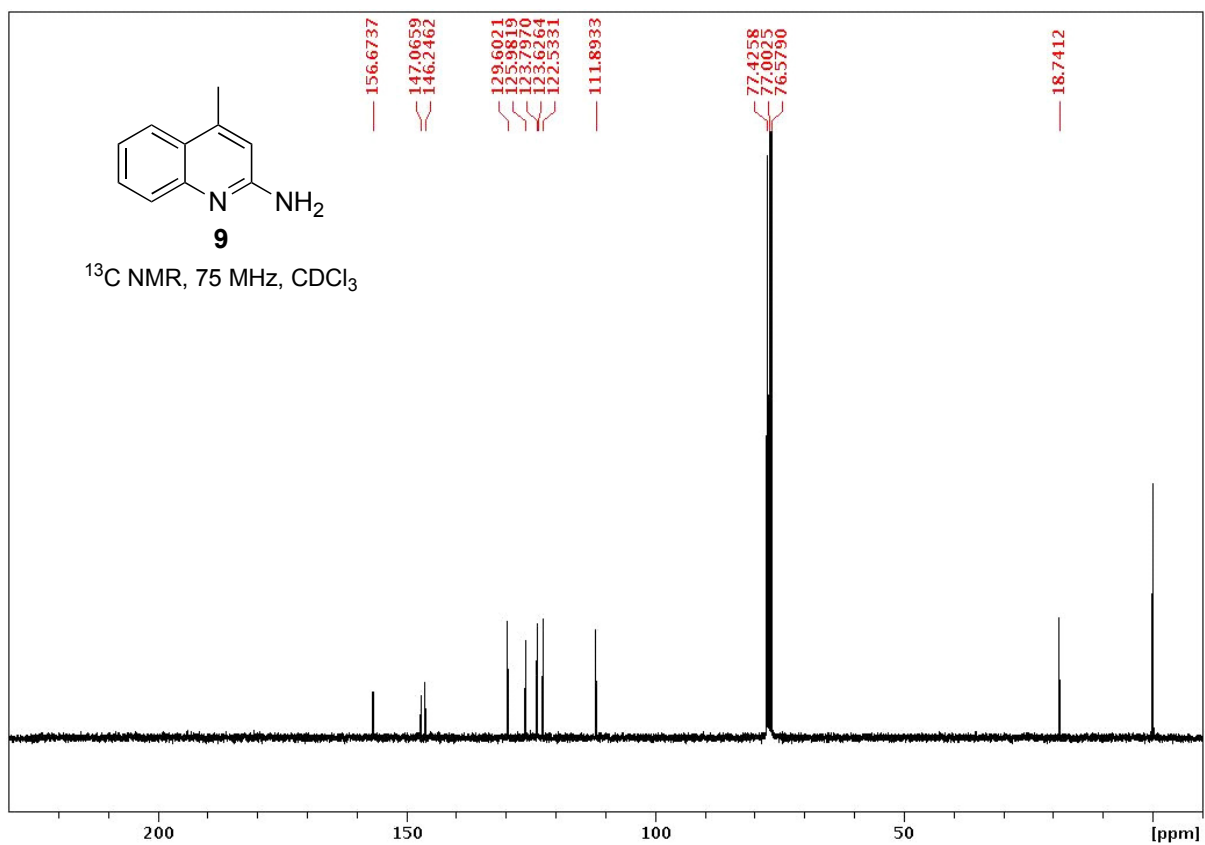

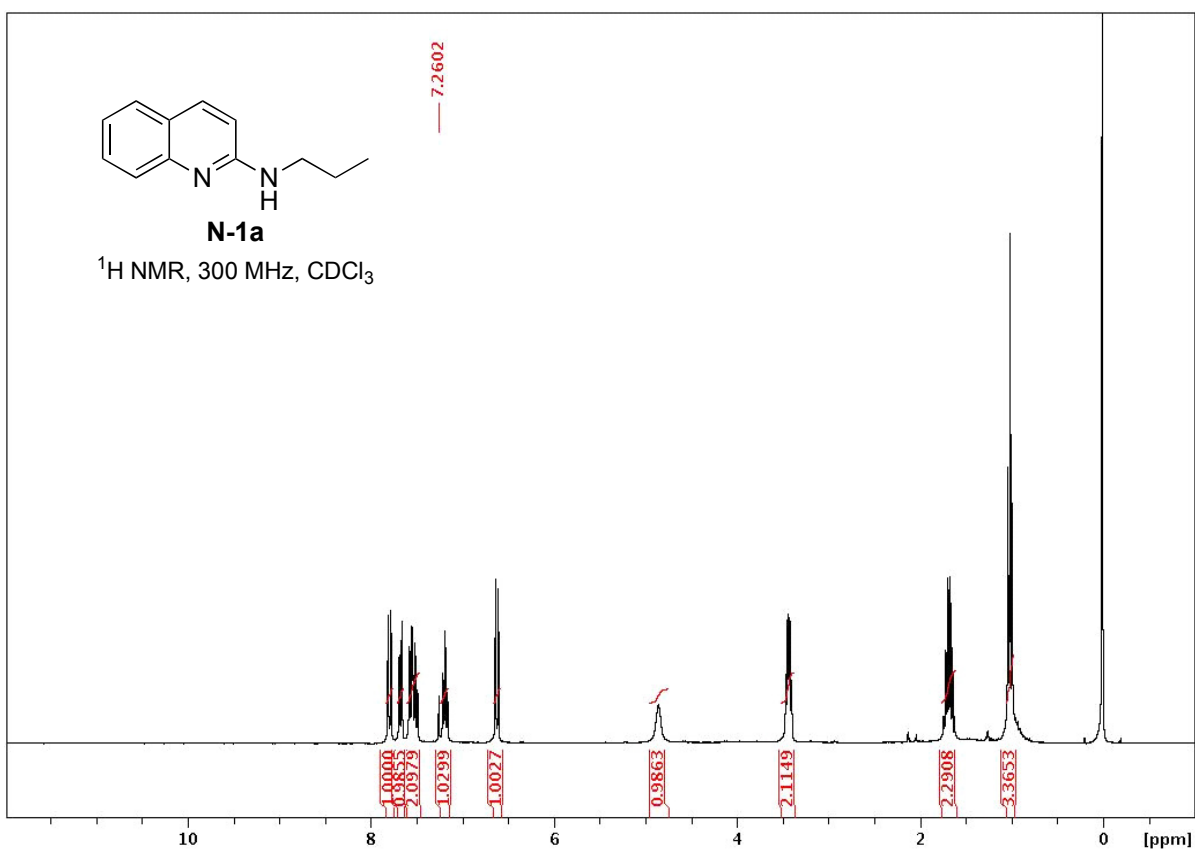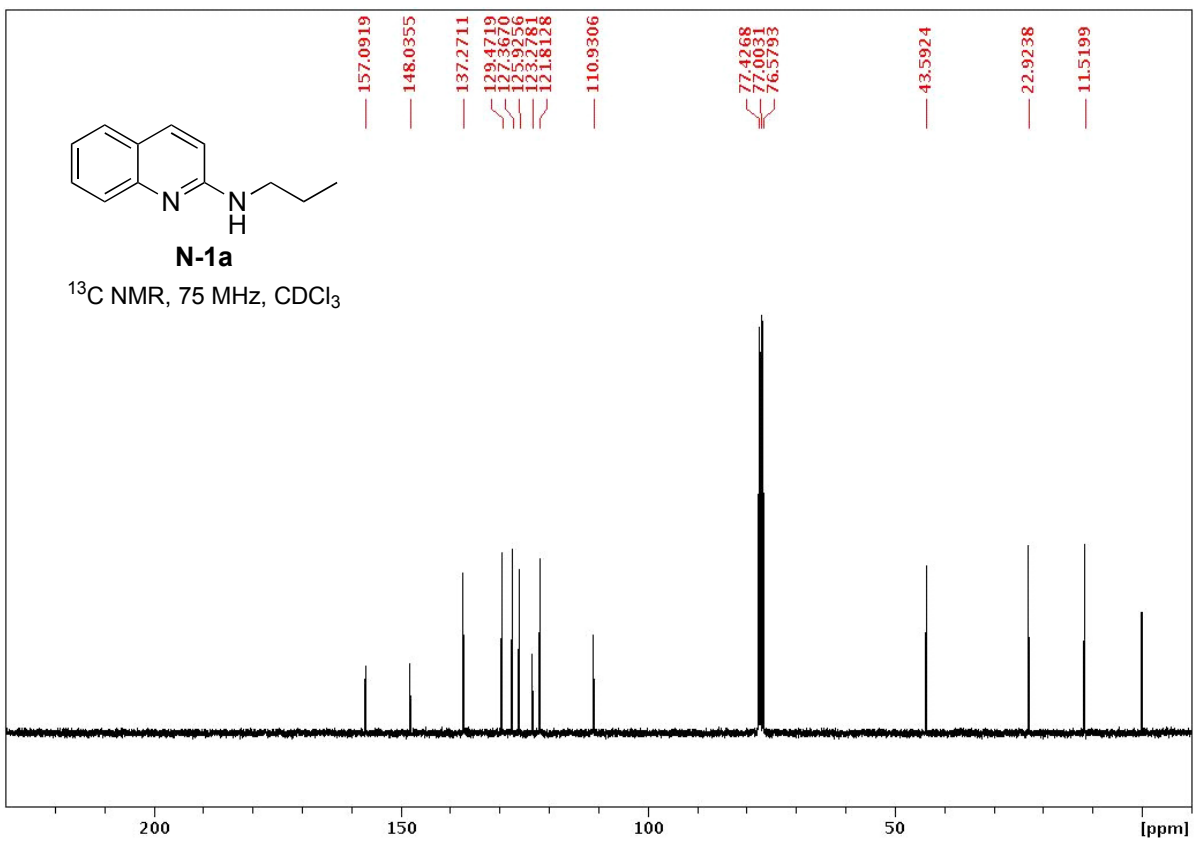

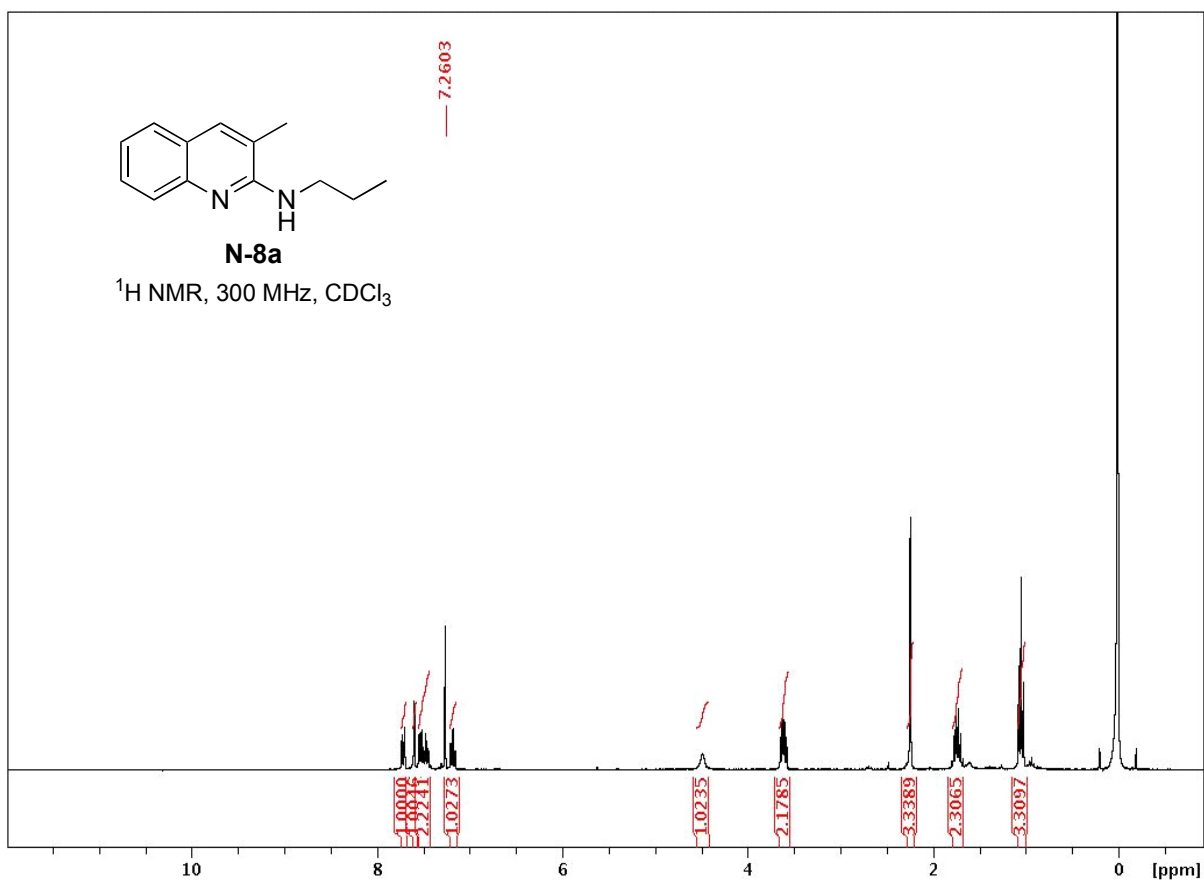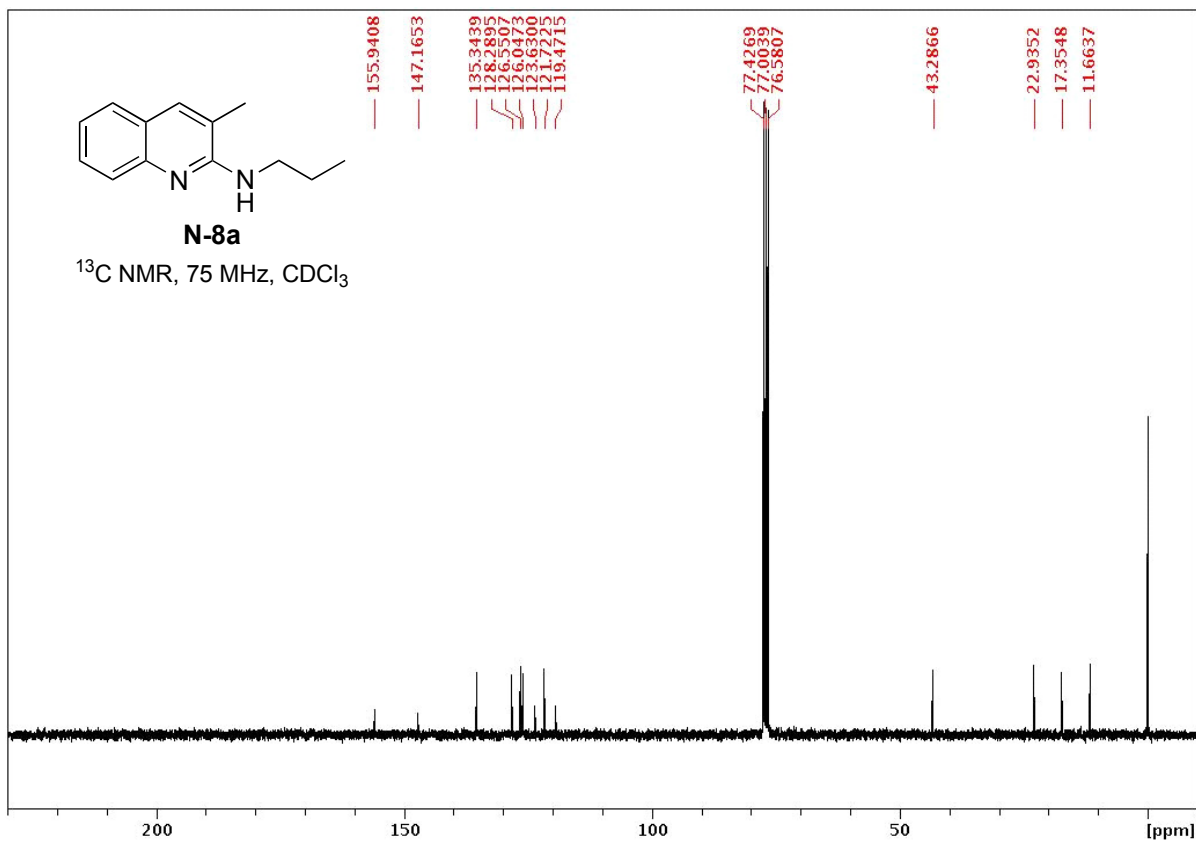

Supplement: c2ob25709b.pdf [file c2ob25709b.pdf]
